# Supplementary material for: Expanding new chemistry of aza-boracyclophanes with unique dipolar structures, AIE and redox-active open-shell characteristics
Source: Royal Society of Chemistry journal article supplement (doi:10.1039/d2sc03581b), 2022-01-01
Supplement: d2sc03581b1.pdf [file d2sc03581b1.pdf]

## **Expanding New Chemistry of Aza-Boracyclophanes with Unique Dipolar Structures, AIE and Redox-Active Open-Shell Characteristics**

Yawei Jia,<sup>a</sup> Pengfei Li,<sup>a</sup> Kanglei Liu,<sup>\*a</sup> Chenglong Li,<sup>a</sup> Meiyan Liu,<sup>a</sup> Jiaqi Di,<sup>a</sup> Nan Wang,<sup>a</sup> Xiaodong Yin,<sup>a</sup> Niu Zhang,<sup>\*b</sup> and Pangkuan Chen<sup>\*a</sup>

<sup>a</sup> Beijing Key Laboratory of Photoelectronic/Electrophotonic Conversion Materials, Key Laboratory of Cluster Science of the Ministry of Education, School of Chemistry and Chemical Engineering, Beijing Institute of Technology of China, Beijing, 102488, China

<sup>b</sup> Analysis & Testing Centre, Beijing Institute of Technology of China, Beijing, 102488, China

\* kanglei\_liu@bit.edu.cn, niuzhang2019@bit.edu.cn, pangkuan@bit.edu.cn.

### **Table of Contents**

|                                                  |     |
|--------------------------------------------------|-----|
| 1. General Experimental Section                  | S2  |
| 2. Synthetic Procedures                          | S4  |
| 3. Characterization by NMR and HRMS Spectroscopy | S10 |
| 4. Electrochemical Data                          | S18 |
| 5. Photophysical Measurements                    | S19 |
| 6. DFT and TD-DFT Computations                   | S25 |

## 1. General Experimental Section

**Materials and Methods:** 2-Bromo-1,3,5-triisopropylbenzene (TipBr) and B(OMe)<sub>3</sub> were distilled under vacuum. Dimethyl(2,4,6-triisopropylphenyl)-boronate [TipB(OMe)<sub>2</sub>] were prepared according to the previously published procedures.<sup>[1]</sup> TBAF (1 M in THF) was purchased from Sigma-Aldrich. Other reagents were purchased from Adamas. Ether was distilled from Na prior to use. All reactions and manipulations involving reactive borane or *n*-BuLi species were carried out under an atmosphere of prepurified nitrogen using either Schlenk techniques or an inert-atmosphere glove box.

400 MHz <sup>1</sup>H, 700 MHz <sup>1</sup>H, 101 MHz <sup>13</sup>C, 176 MHz <sup>13</sup>C, and 225 MHz <sup>11</sup>B NMR spectra were recorded the Bruker spectrometers. <sup>11</sup>B NMR spectra were acquired with boron-free quartz NMR tubes and the spectra were referenced externally to BF<sub>3</sub>·Et<sub>2</sub>O ( $\delta = 0$ ).

High resolution mass spectral data were obtained *via* ESI on an Agilent (Q-TOF 6520) analyzer. MALDI-MS measurements were performed on a Bruker AutoFlex MAX in linear (+) mode. Benzo[ $\alpha$ ]pyrene (10 mg/mL) and DHB (10 mg/mL) used as the matrix were mixed with the samples (10 mg/mL in toluene) in a 10 : 1 ratio, and then spotted on the wells of a target plate.

UV-Visible absorption spectra were recorded on a Cary 300 UV-Vis spectrophotometer. The fluorescence data (including temperature-dependent emission spectra, lifetime) was measured on an Edinburgh Instruments FLS980 spectrophotometer. Other fluorescence spectra were recorded on a Lengguang Tech F97 Pro spectrophotometer. Fluorescent quantum efficiencies were determined using a Hamamatsu Quantaurus-QY spectrometer (C11347-11).

Electrochemical measurements were conducted on an AUTOLAB-CV-75W analyzer with a scan rate of 100 mV/s. The electrochemical cell was a standard three-compartment cell composed of a glass carbon working electrode, a Pt auxiliary electrode, and a Pt wire reference electrode. All tests were performed using [Bu<sub>4</sub>N][PF<sub>6</sub>] (0.1 M) as the supporting electrolyte. The voltammograms were obtained

in anhydrous and nitrogen-saturated THF or CH<sub>2</sub>Cl<sub>2</sub> solutions. The potentials are reported relative to the ferrocene/ferrocenium couple. The EPR measurement was performed on a JEOL JES FA200 X-band EPR spectrometer (9.05 GHz). Samples for EPR test were prepared under nitrogen atmosphere, the radical anion was obtained via oxidation of neutral compound with AgSbF<sub>6</sub> in CH<sub>2</sub>Cl<sub>2</sub>, and then the samples were sealed in capillary tube.

DFT calculations were performed with the Gaussian 09 program. Geometry optimizations and vertical excitations were calculated by means of hybrid density functional B3LYP with the basis set of 6-31G\*. The input files and orbital representations were generated with Gaussview 5.0 (scaling radii of 75%, isovalue = 0.02). Excitation data were calculated using TD-DFT (B3LYP/6-311G\*) and (TD-DFT) CAM-B3LYP/6-311G\*. The resulting structures were confirmed to be stationary points through vibrational frequency analysis.

## 2. Synthetic Procedures

### 2.1 Synthesis

#### Synthesis of MC-BN5

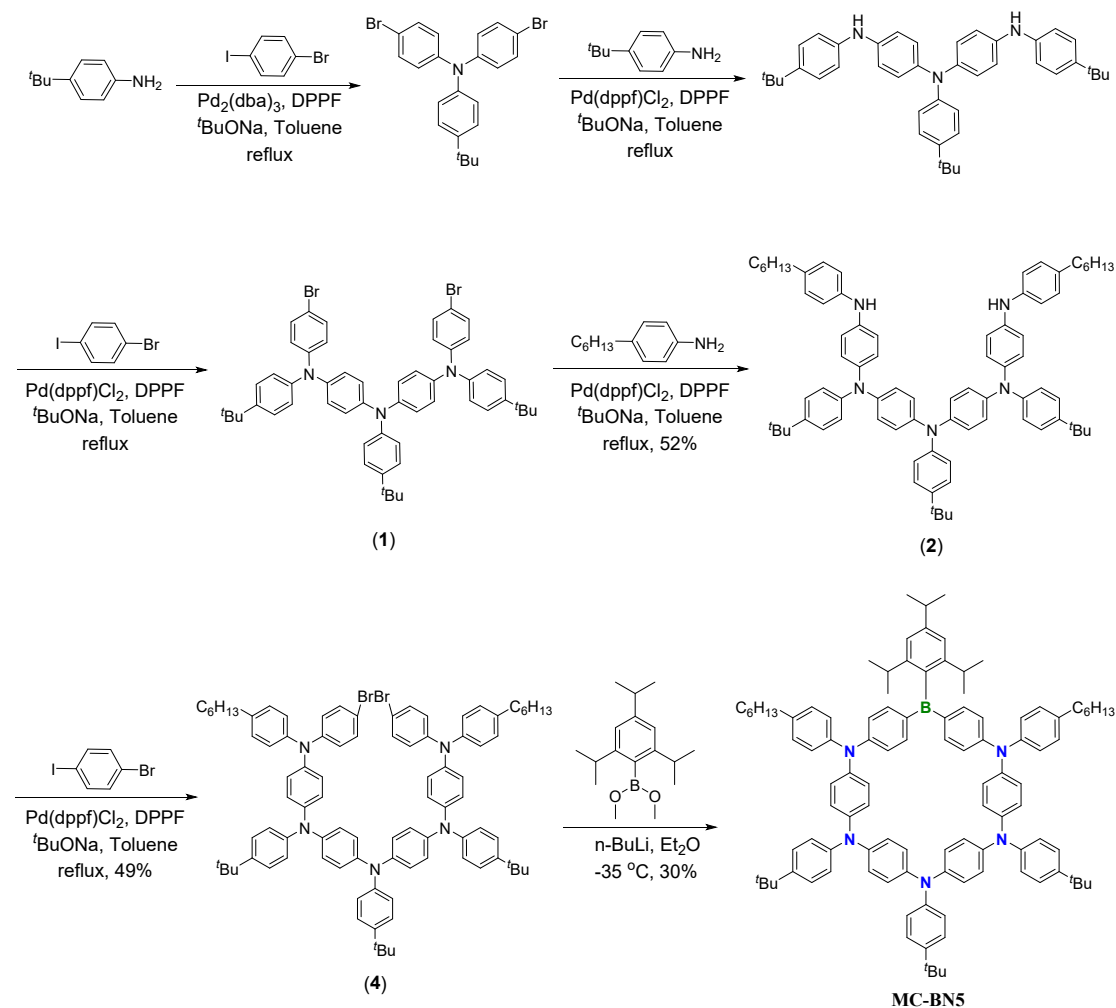

Compound **1** was prepared via a previously reported procedure.<sup>[2]</sup>

#### 2.1.1 Synthesis of **2**

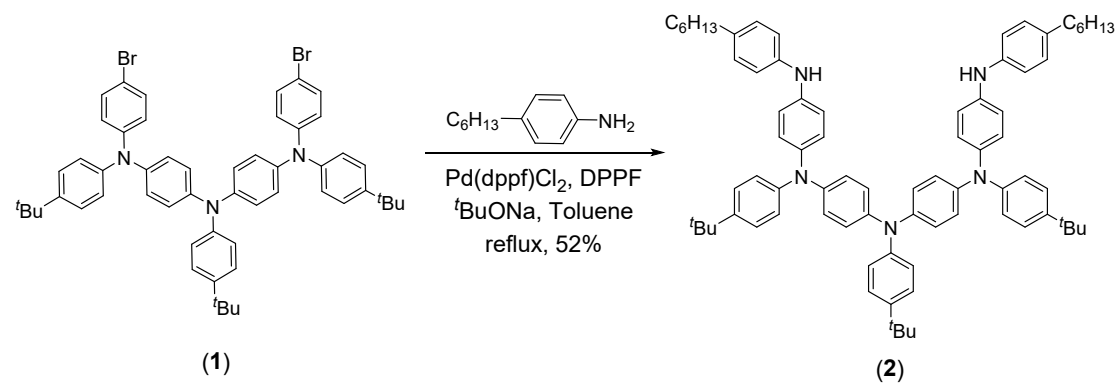

A mixture of **1** (1.0 g, 1.0 equiv), 4-hexylaniline (431.2 mg, 2.2 equiv), <sup>t</sup>BuONa (265.6 mg, 2.5equiv), Pd(dppf)Cl<sub>2</sub> (82 mg, 0.1 equiv) and DPPF (62 mg, 0.1 equiv) in toluene (20 mL) was refluxed at 120 °C overnight under N<sub>2</sub>. After the mixture was cooled down, 100 mL of deionized water was added to the resulting solution and the mixture was extracted from ethyl acetate (EA). The organic phase was dried over Na<sub>2</sub>SO<sub>4</sub> and was further purified by column chromatography on silica gel using EA/PE (1/25, v/v) as eluent to give **2** (626 mg, yield: 52%) as a brown solid. <sup>1</sup>H NMR (400 MHz, acetone-d<sub>6</sub>) δ 7.26–7.23 (m, 6H), 7.14 (s, 2H), 7.06–7.00 (m, 12H), 6.98–6.94 (m, 10H), 6.90–6.85 (m, 8H), 2.53 (t, *J* = 7.6 Hz, 4H), 1.59 (quint, *J* = 7.6 Hz, 4H), 1.36–1.28 (m, 39H), 0.89 (t, *J* = 6.8 Hz, 6H) ppm. <sup>13</sup>C NMR (101 MHz, acetone-d<sub>6</sub>) δ 145.8, 144.5, 144.1, 143.3, 142.2, 141.7, 140.4, 140.1, 134.4, 129.0, 126.4, 125.94, 125.86, 124.9, 123.8, 122.6, 122.1, 118.0, 117.5, 35.0, 33.9, 33.8, 31.64, 31.61, 30.9, 22.4, 13.5 ppm. ESI-HRMS (*m/z*): calcd. for C<sub>78</sub>H<sub>91</sub>N<sub>5</sub>[M]<sup>+</sup> 1097.7269, found 1097.7360.

### 2.1.2 Synthesis of **4**

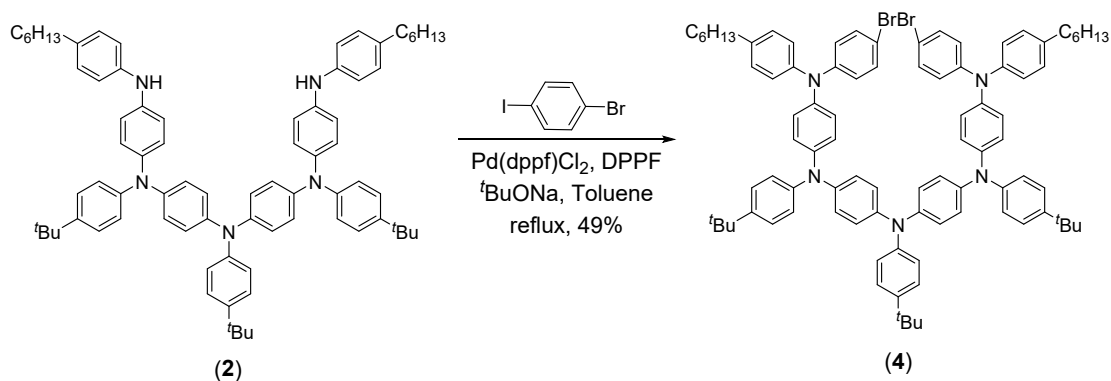

A mixture of **2** (1.24 g, 1.0 equiv), 1-bromo-4-iodobenzene (958.7 mg, 3.0 equiv), <sup>t</sup>BuONa (542.8 mg, 5.0 equiv), Pd(dppf)Cl<sub>2</sub> (83 mg, 0.1 equiv) and DPPF (63 mg, 0.1 equiv) in toluene (20 mL) was refluxed at 120 °C overnight under N<sub>2</sub>. After the mixture was cooled down, 100 mL of deionized water was added to the resulting solution and the mixture was extracted with CH<sub>2</sub>Cl<sub>2</sub>. The organic phase was dried over Na<sub>2</sub>SO<sub>4</sub> and was further purified by column chromatography on silica gel using CH<sub>2</sub>Cl<sub>2</sub>/PE (1/10, v/v) as eluent to give **4** (779 mg, yield: 49%) as a white solid. <sup>1</sup>H NMR (400 MHz, C<sub>6</sub>D<sub>6</sub>) δ 7.23–7.19 (m, 12H), 7.13–7.11 (m, 4H), 7.07–7.05 (m, 16H), 6.97 (d, *J* = 8.4 Hz, 4H), 6.92 (d, *J* = 8.4 Hz, 4H), 6.82 (d, *J* = 8.4 Hz, 4H), 2.45 (t, *J* = 7.6 Hz, 4H), 1.53 (quint, *J* = 7.6 Hz, 4H), 1.26–1.22 (m, 39H), 0.87 (t, *J* = 6.8 Hz, 6H) ppm. <sup>13</sup>C NMR (101 MHz, C<sub>6</sub>D<sub>6</sub>) δ 147.4, 145.6, 145.5, 145.4, 145.3, 145.2, 143.9, 143.2, 142.8, 141.9, 137.9, 132.1, 129.4, 126.2, 125.6, 125.3, 124.9,

124.6, 124.4, 124.1, 123.9, 123.8, 113.9, 35.4, 34.0, 31.7, 31.6, 31.2, 29.1, 22.7, 14.0 ppm. MALDI-MS (pos.) (m/z): calcd. for  $C_{90}H_{97}Br_2N_5 [M]^+$  1407.6102, found 1407.6115.

### 2.1.3 Synthesis of MC-BN5

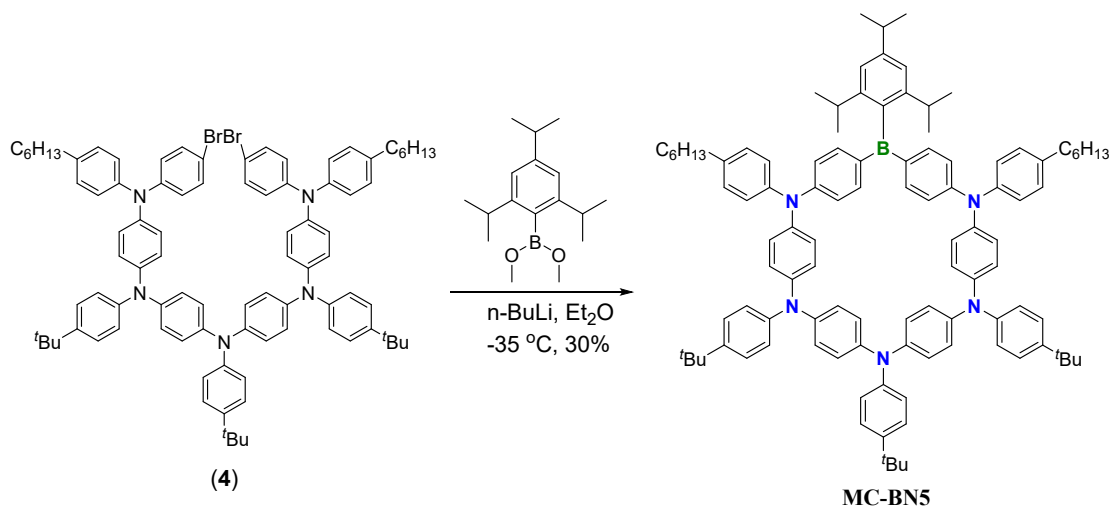

To a solution of **4** (300 mg, 1.0 equiv) in anhydrous  $Et_2O$  (30 mL) was added  $n-BuLi$  (1.6 M solution in hexane, 0.3 mL, 2.2 equiv) dropwise at  $-35\text{ }^\circ\text{C}$ . The mixture was stirred for 30 min and then allowed to warm up to  $0\text{ }^\circ\text{C}$ .  $TipB(OMe)_2$  (88 mg, 1.5 equiv) was added via a syringe. The mixture was stirred at  $0\text{ }^\circ\text{C}$  for 30 min, then stirred at ambient temperature for 30 min and refluxed overnight under  $N_2$ . After the mixture was cooled down, the solid was removed by filtration through a fritted glass disk. The crude product was further purified by column chromatography on silica gel using toluene/hexane mixture (1/10, v/v) as the eluent. A solution of the purified product in EA was washed with EA and  $n$ -hexane to give a green solid. (94.0 mg, 30% yield).  $^1H$  NMR (700 MHz,  $C_6D_6$ )  $\delta$  7.76 (d,  $J = 8.4$  Hz, 4H), 7.27 (s, 2H), 7.23 (d,  $J = 8.4$  Hz, 2H), 7.18–7.17 (m, 6H), 7.14–7.11 (m, 16H), 7.09 (d,  $J = 9.1$  Hz, 4H), 7.01–6.98 (m, 12H), 2.97 (hept,  $J = 7.0$  Hz, 1H), 2.91 (hept,  $J = 7.0$  Hz, 2H), 2.47 (t,  $J = 7.7$  Hz, 4H), 1.55 (quint,  $J = 7.0$  Hz, 4H), 1.38 (d,  $J = 7.0$  Hz, 6H), 1.27–1.19 (m, 51H), 0.87 (t,  $J = 7.0$  Hz, 6H) ppm.  $^{13}C$  NMR (176 MHz,  $C_6D_6$ )  $\delta$  151.6, 149.6, 148.5, 146.1, 146.0, 145.8, 145.1, 144.8, 144.6, 143.7, 143.1, 142.5, 142.2 (C-B), 139.8, 139.0, 136.1 (C-B), 129.8, 126.6, 126.4, 126.2, 126.1, 125.8, 124.9, 124.8, 123.1, 120.3, 119.0, 35.8, 35.7, 35.0, 34.3, 34.2, 32.1, 32.0, 31.6, 31.5, 29.4, 24.7, 23.0, 14.3 ppm.  $^{11}B$  NMR (225 MHz,  $C_6D_6$ )  $\delta = 31$  ppm. MALDI-MS (pos.) m/z: calcd. for  $C_{105}H_{120}BN_5 [M]^+$  1462.9673, found 1462.9664.

## Synthesis of MC-ABN5

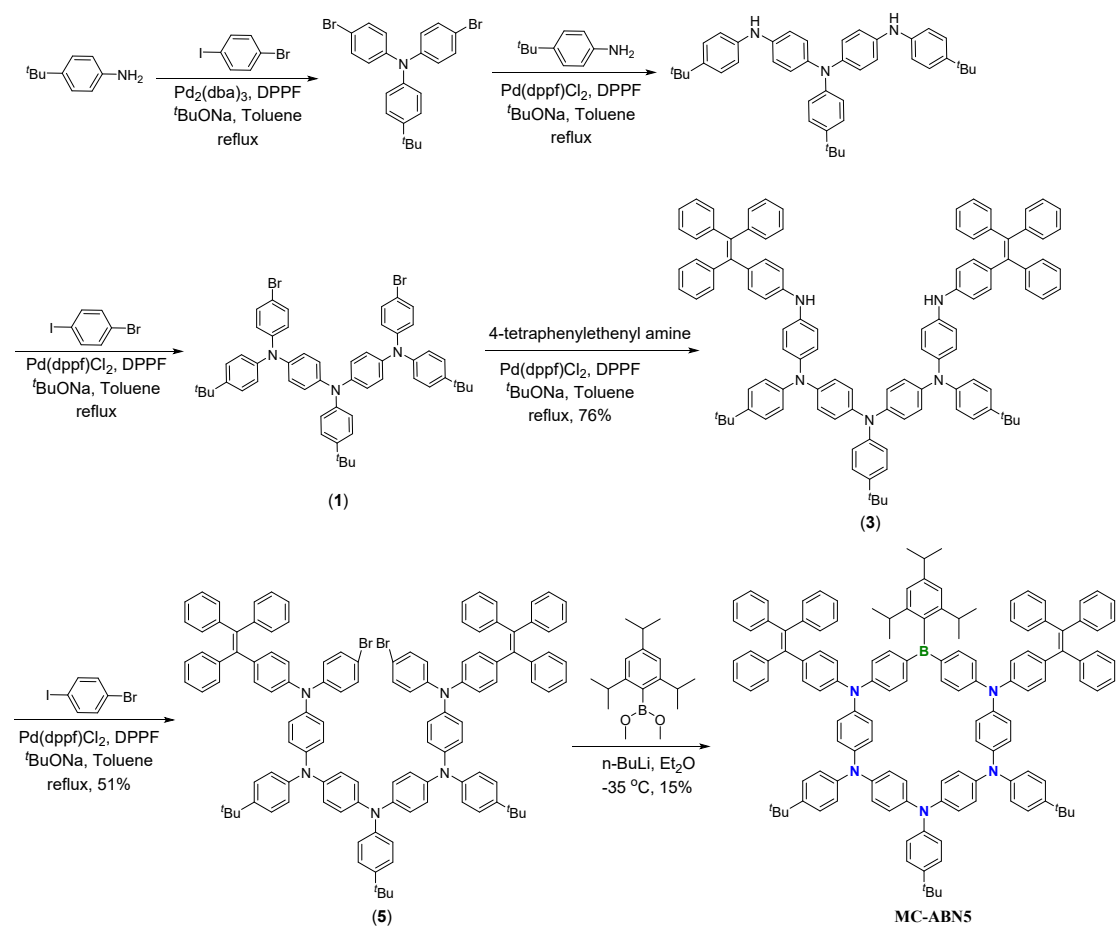

Compound **1** was prepared via a previously reported procedure.<sup>[2]</sup>

### 2.2.1 Synthesis of **3**

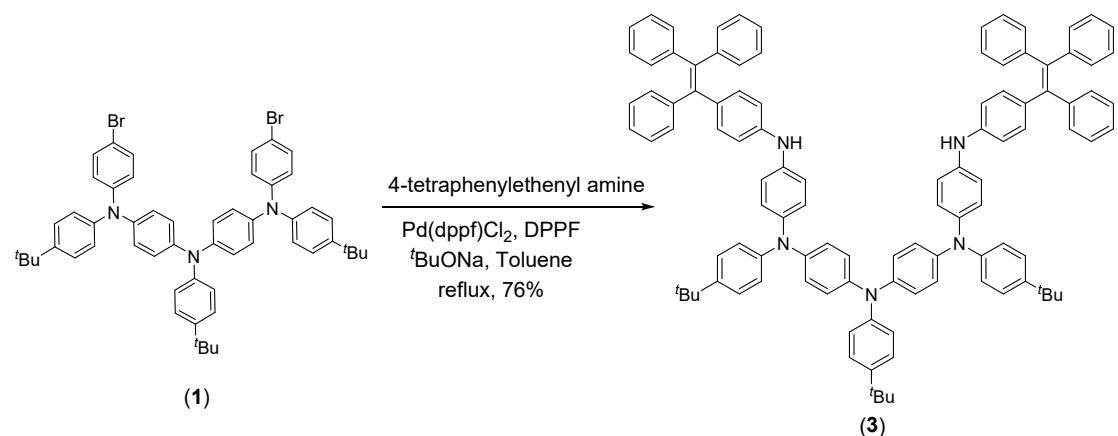

A mixture of **1** (473.5 mg, 1.0 equiv), 4-tetraphenylethenyl amine (364 mg, 2.0 equiv),  $\text{tBuONa}$  (151 mg, 3.0 equiv),  $\text{Pd}(\text{dppf})\text{Cl}_2$  (53 mg, 0.1 equiv) and DPPF (40 mg, 0.1 equiv) in toluene (10 mL) was refluxed at 120 °C overnight under  $\text{N}_2$ . After the mixture was cooled down, 100 mL of deionized water was added to the resulting solution and the mixture was extracted with  $\text{CH}_2\text{Cl}_2$ . The

organic phase was dried over  $\text{Na}_2\text{SO}_4$  and was further purified by column chromatography on silica gel using EA/PE (1/10, v/v) as eluent to give **3** (572.6 mg, yield: 76%) as a green solid.  $^1\text{H}$  NMR (700 MHz,  $\text{C}_6\text{D}_6$ )  $\delta$  7.25–1.24 (m, 10H), 7.19–7.16 (m, 14H), 7.11 (d,  $J = 9.1$  Hz, 2H), 7.07–7.04 (m, 12H), 7.01–6.97 (m, 10H), 6.95–6.92 (m, 8H), 6.89 (t,  $J = 7.7$  Hz, 2H), 6.67 (d,  $J = 8.4$  Hz, 4H), 6.57 (d,  $J = 7.7$  Hz, 4H), 4.85 (s, 2H), 1.23 (s, 18H), 1.22 (s, 9H).  $^{13}\text{C}$  NMR (176 MHz,  $\text{C}_6\text{D}_6$ )  $\delta$  145.9, 145.8, 144.8, 144.63, 144.55, 144.4, 143.2, 142.8, 142.5, 142.0, 141.1, 139.9, 137.6, 135.5, 132.6, 131.7, 131.61, 131.59, 126.5, 126.32, 126.25, 126.2, 126.1, 125.6, 125.0, 124.6, 123.4, 123.1, 120.0, 115.5, 33.9, 31.2, 31.2. ESI-HRMS ( $m/z$ ): calcd. for  $\text{C}_{106}\text{H}_{95}\text{N}_5$   $[\text{M}]^+$  1438.7580, found 1438.7621.

### 2.2.2 Synthesis of **5**

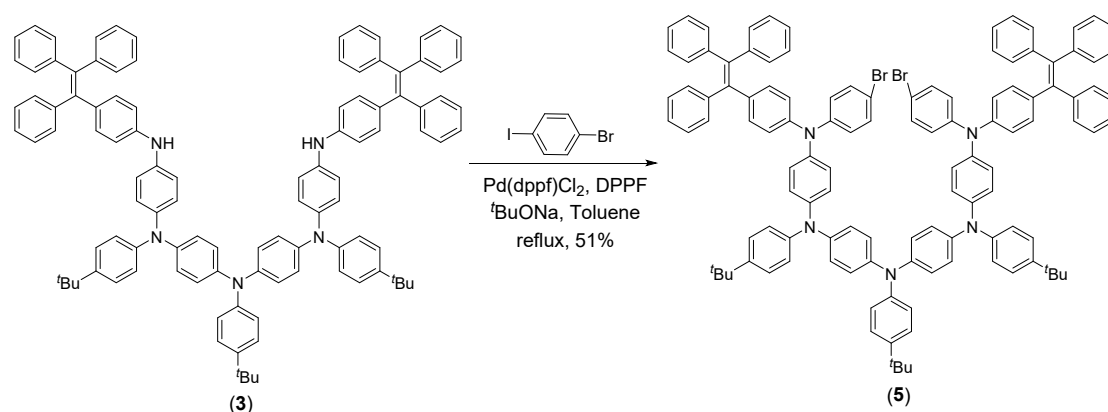

A mixture of **3** (572.6 mg, 1.0 equiv), 1-bromo-4-iodobenzene (563 mg, 5.0 equiv),  $t\text{BuONa}$  (191.3 mg, 5.0 equiv),  $\text{Pd}(\text{dppf})\text{Cl}_2$  (29 mg, 0.1 equiv) and DPPF (22 mg, 0.1 equiv) in toluene (10 mL) was refluxed at 120 °C overnight under  $\text{N}_2$ . After the mixture was cooled down, 100 mL of deionized water was added to the resulting solution and the mixture was extracted with  $\text{CH}_2\text{Cl}_2$ . The organic phase was dried over  $\text{Na}_2\text{SO}_4$  and was further purified by column chromatography on silica gel using  $\text{CH}_2\text{Cl}_2/\text{PE}$  (1/10, v/v) as eluent to give **5** (355 mg, yield: 51%) as a yellow solid.  $^1\text{H}$  NMR (400 MHz,  $\text{C}_6\text{D}_6$ )  $\delta$  7.23–7.19 (m, 20H), 7.13–6.89 (m, 42H), 6.85 (d,  $J = 8.4$  Hz, 4H), 6.79–6.76 (m, 8H), 1.22 (s, 27H) ppm.  $^{13}\text{C}$  NMR (101 MHz,  $\text{C}_6\text{D}_6$ )  $\delta$  146.8, 145.9, 145.5, 145.41, 145.35, 144.3, 143.9, 143.8, 143.3, 142.7, 141.2, 140.83, 140.79, 138.1, 132.5, 132.1, 131.5, 127.8, 127.6, 126.54, 126.48, 126.4, 126.3, 126.2, 126.1, 125.3, 125.1, 124.9, 124.2, 124.0, 123.8, 122.2, 114.7, 34.0, 31.2 ppm. MALDI-MS (pos.)  $m/z$ : calcd. for  $\text{C}_{118}\text{H}_{101}\text{Br}_2\text{N}_5$   $[\text{M}]^+$  1748.6441, found 1748.6464.



### 2.2.3 Synthesis of MC-ABN5

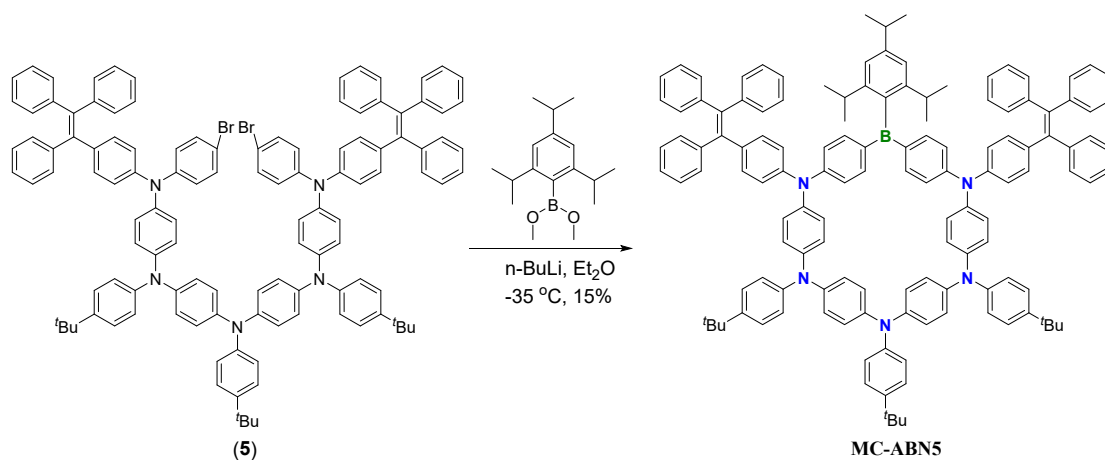

To a solution of **5** (167 mg, 1.0 equiv) in anhydrous Et<sub>2</sub>O (25 mL) was added *n*-BuLi (1.6 M solution in hexane, 0.13 mL, 2.2 equiv) dropwise at -35 °C. The mixture was stirred for 30 min and then allowed to warm up to 0 °C. TipB(OMe)<sub>2</sub> (40 mg, 1.5 equiv) was added via a syringe. The mixture was stirred at 0 °C for 30 min, then stirred at ambient temperature for 30 min and refluxed overnight under N<sub>2</sub>. After the mixture was cooled down, the solid was removed by filtration through a fritted glass disk. The crude product was further purified by column chromatography on silica gel using toluene/hexane mixture (1/10, v/v) as the eluent. A solution of the purified product in EA was washed with EA and *n*-hexane to give a green solid. (26.0 mg, 15% yield). <sup>1</sup>H NMR (700 MHz, C<sub>6</sub>D<sub>6</sub>) δ 7.73 (d, *J* = 8.4 Hz, 4H), 7.27 (s, 2H), 7.25–7.23 (m, 6H), 7.18 (d, *J* = 8.4 Hz, 4H), 7.13–7.09 (m, 22H), 7.03–6.88 (m, 38H), 2.96 (hept, *J* = 7.0 Hz, 1H), 2.87 (hept, *J* = 7.0 Hz, 2H), 1.36 (d, *J* = 7.0 Hz, 6H), 1.23–1.21 (m, 39H) ppm. <sup>13</sup>C NMR (176 MHz, C<sub>6</sub>D<sub>6</sub>) δ 150.9, 149.6, 148.7, 146.1, 146.0, 145.9, 145.34, 145.29, 144.9, 144.5, 144.2, 144.1, 143.8, 143.0, 142.1, 142.0 (C-B), 141.5, 141.2, 139.64, 139.56, 136.6 (C-B), 132.8, 131.86, 131.85, 131.8, 127.0, 126.9, 126.8, 126.7, 126.4, 126.3, 126.0, 125.1, 124.8, 124.5, 122.9, 120.4, 119.6, 35.8, 35.0, 34.34, 34.26, 31.6, 31.5, 24.7, 24.6 ppm. <sup>11</sup>B NMR (225 MHz, C<sub>6</sub>D<sub>6</sub>) δ = 56 ppm. MALDI-MS (pos.) *m/z*: calcd. for C<sub>133</sub>H<sub>124</sub>BN<sub>5</sub> [M]<sup>+</sup> 1802.9988, found 1802.9986.

### 3. Characterization by NMR and HRMS Spectroscopy

#### 3.1 NMR Spectra of 2

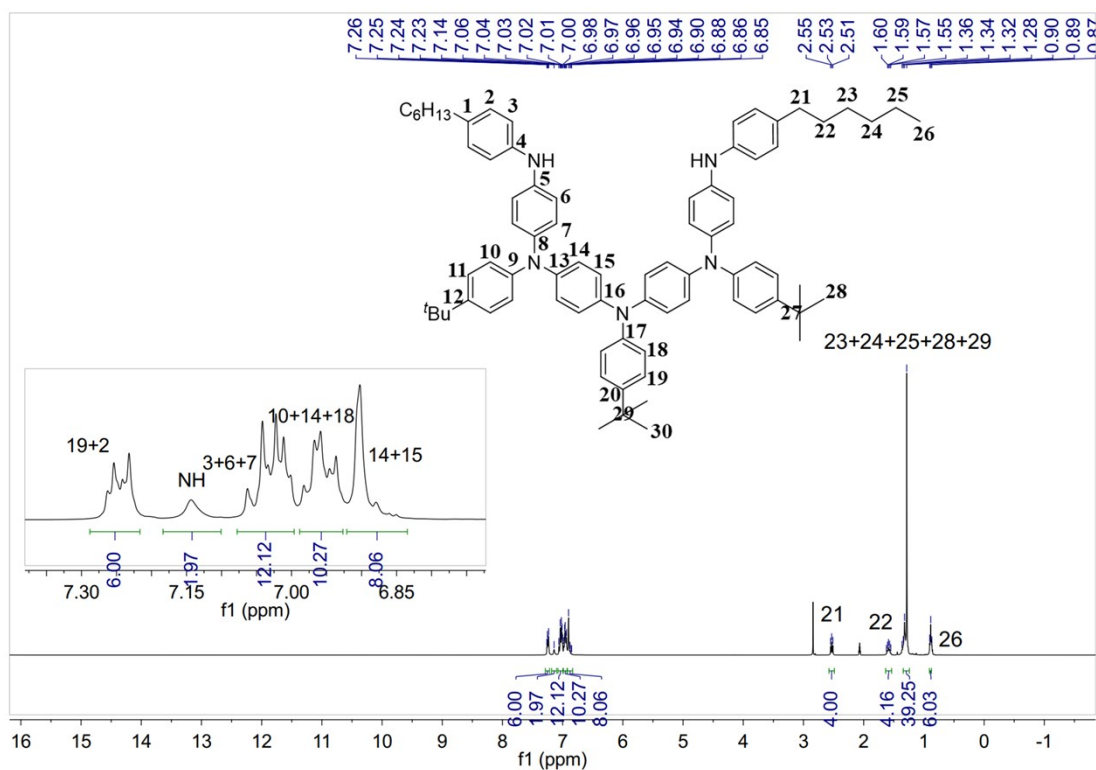

Figure S1. <sup>1</sup>H NMR (400 MHz, acetone-d<sub>6</sub>) spectrum of 2.

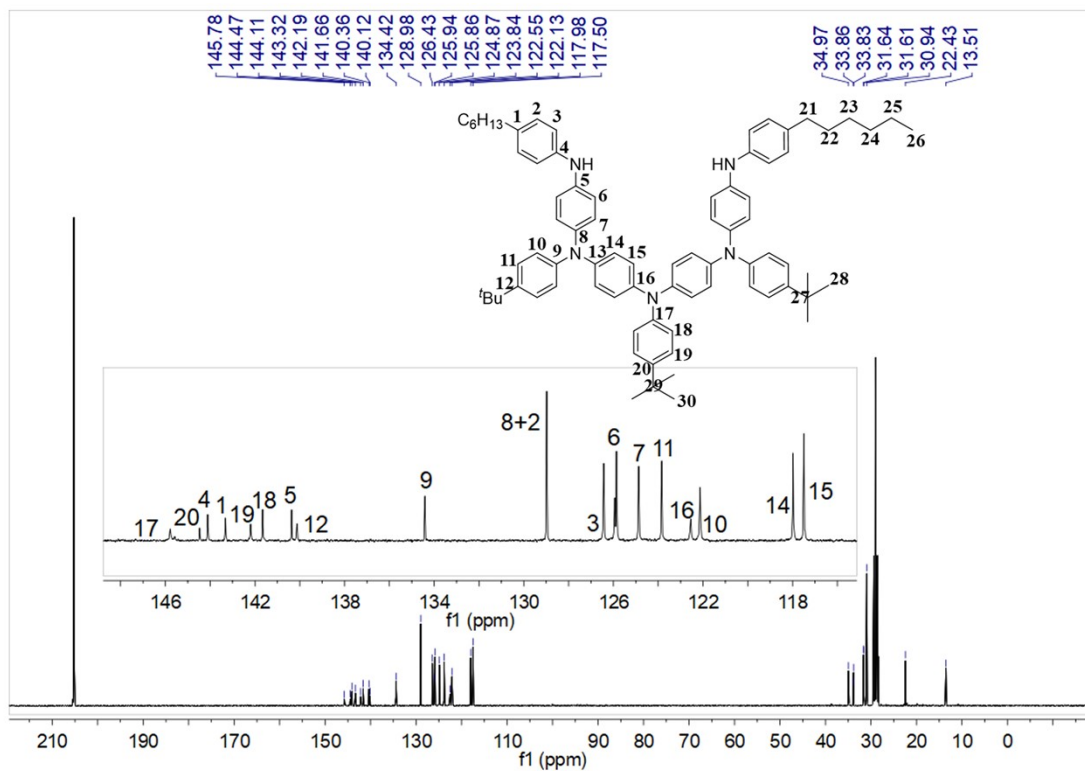

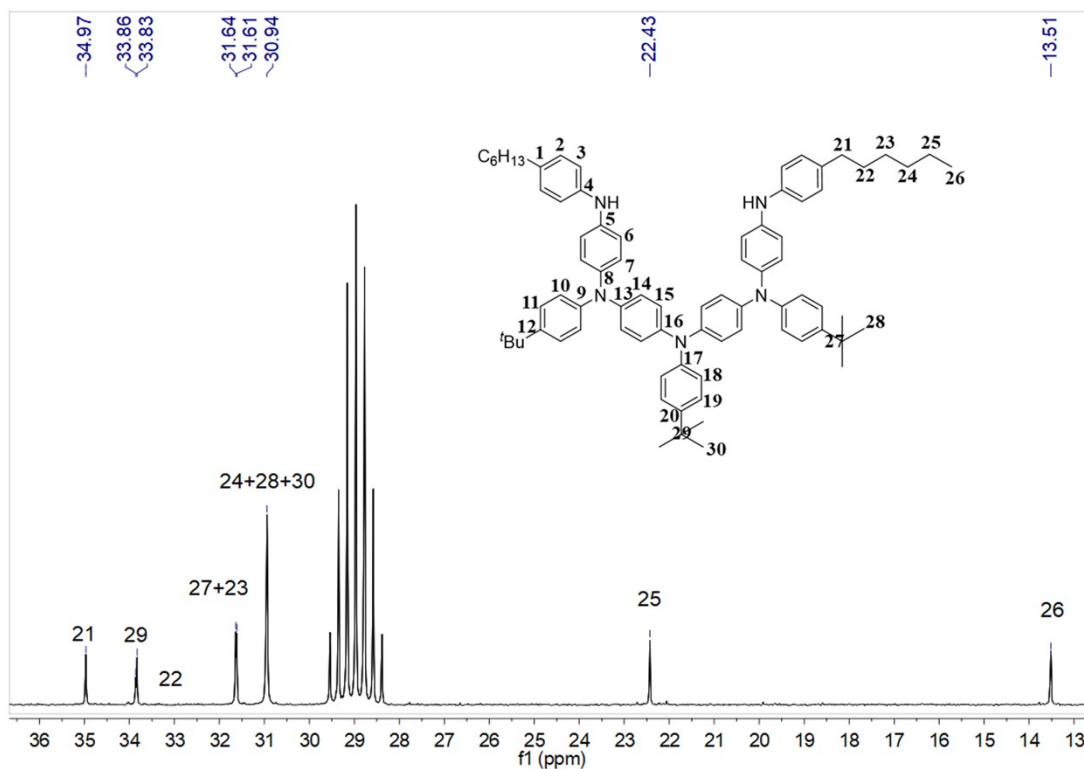

Figure S2.  $^{13}\text{C}$  NMR (101 MHz, acetone- $d_6$ ) spectrum of **2**.

### 3.2 NMR Spectra of **4**

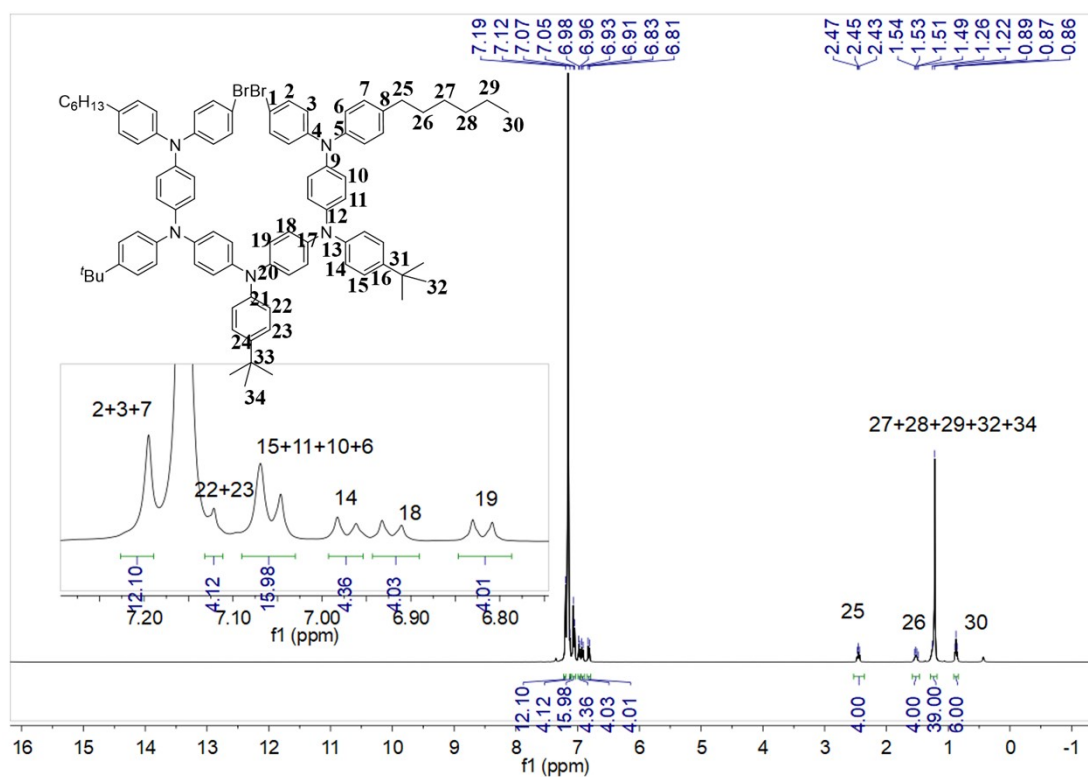

Figure S3.  $^1\text{H}$  NMR (400 MHz,  $\text{C}_6\text{D}_6$ ) spectrum of **4**.

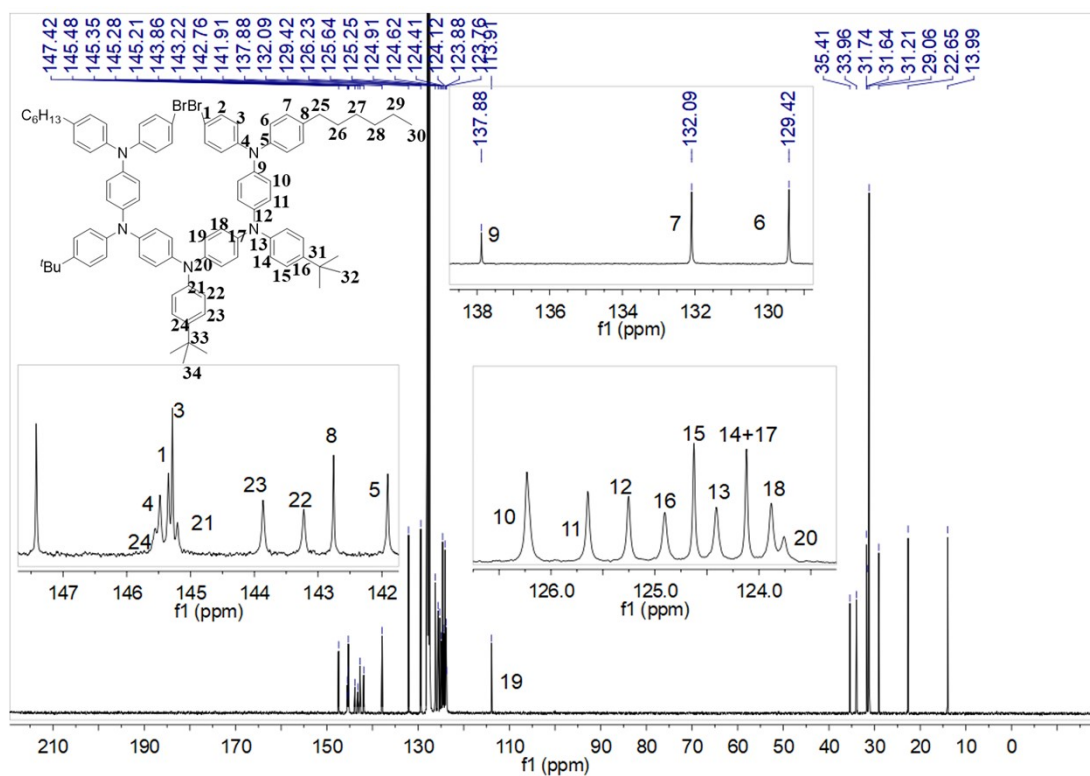

Figure S4.  $^{13}\text{C}$  NMR (101 MHz,  $\text{C}_6\text{D}_6$ ) spectrum of **4**.

### 3.3 NMR Spectra of MC-BN5

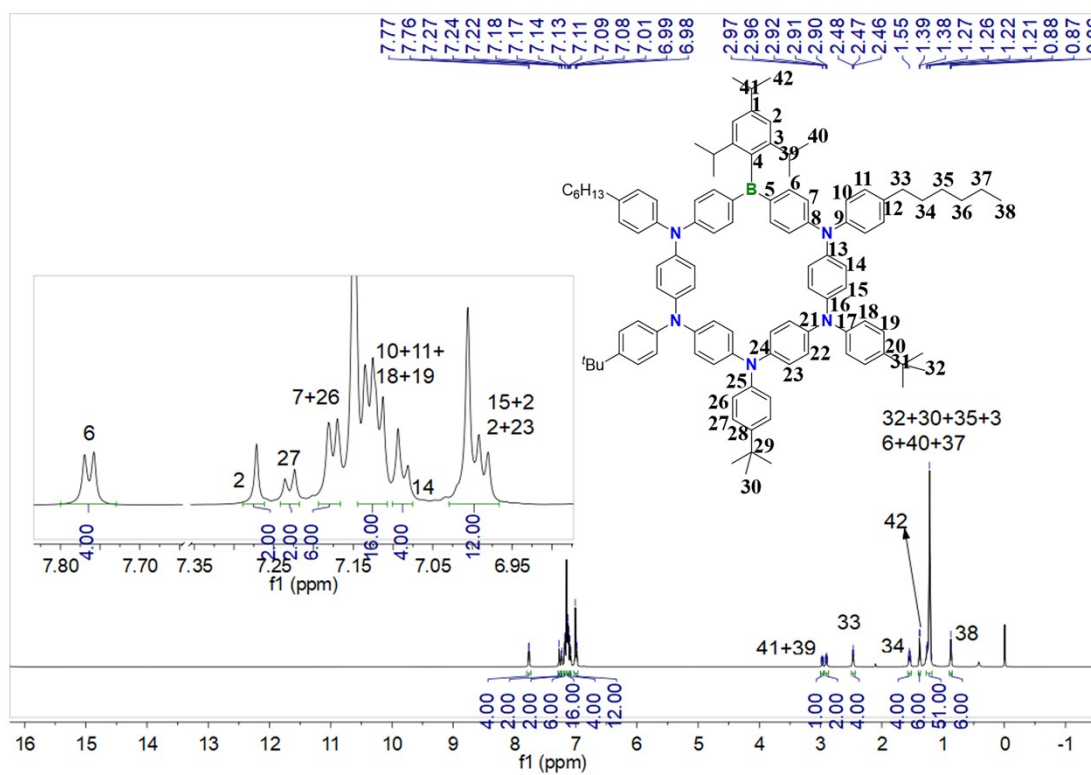

Figure S5.  $^1\text{H}$  NMR (700 MHz,  $\text{C}_6\text{D}_6$ ) spectrum of MC-BN5.

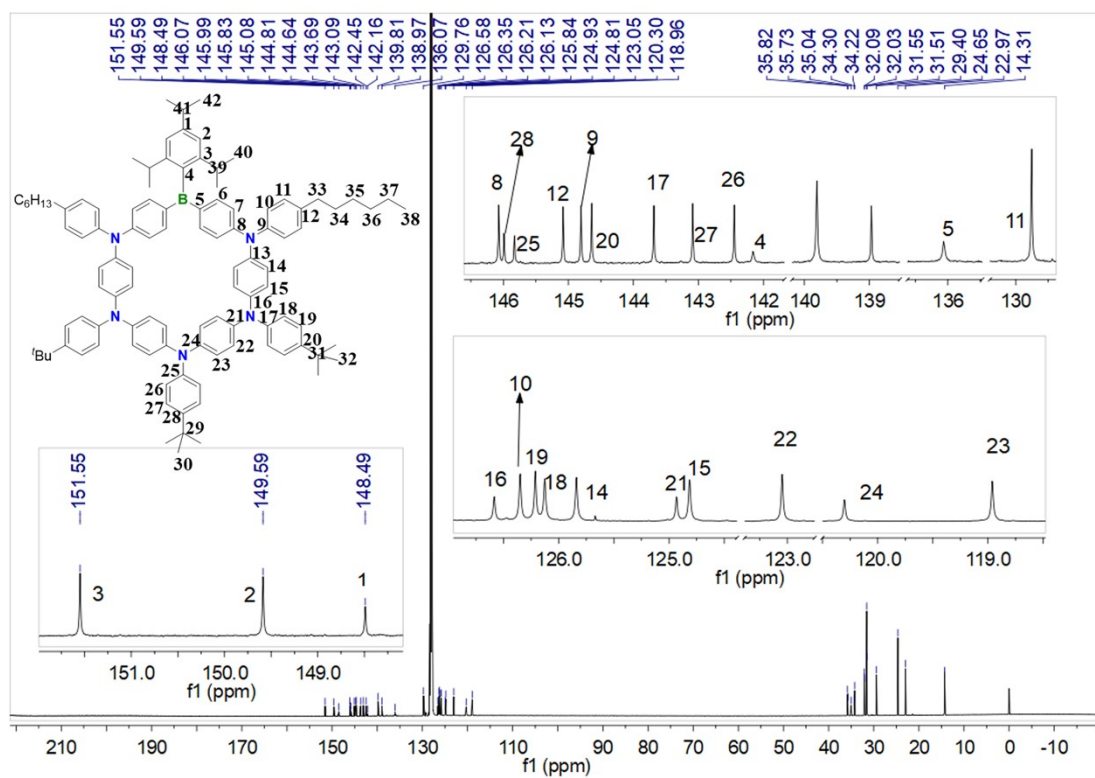

Figure S6.  $^{13}\text{C}$  NMR (176 MHz,  $\text{C}_6\text{D}_6$ ) spectrum of MC-BN5.

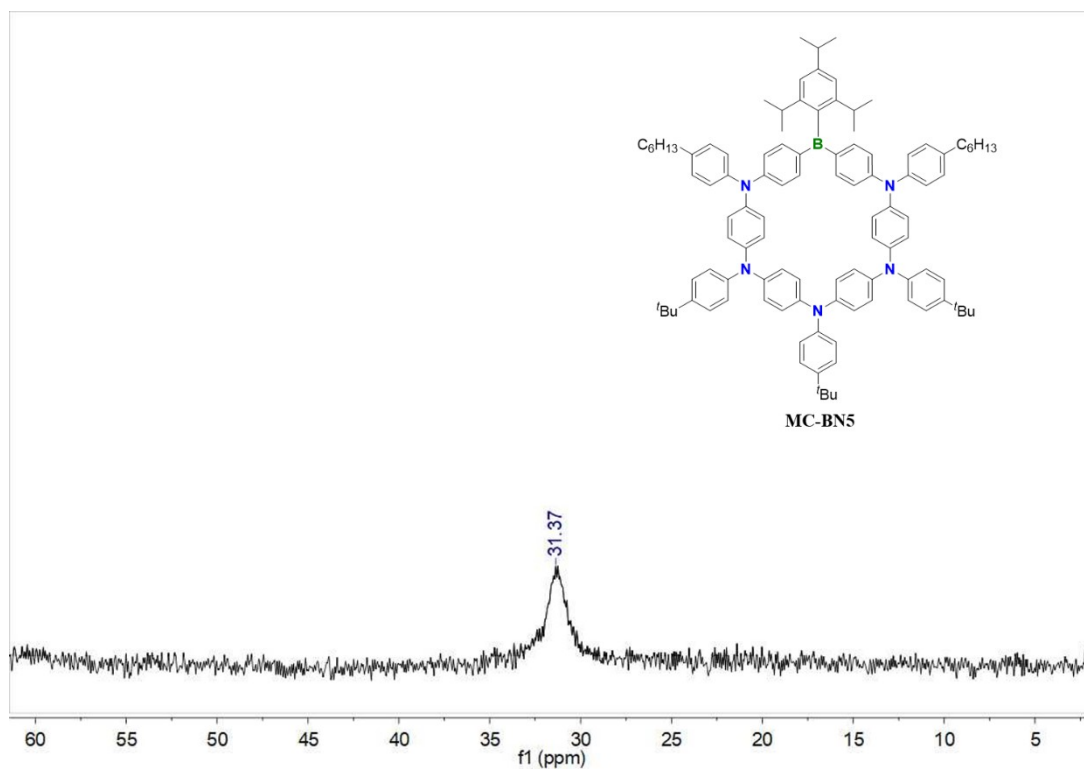

Figure S7.  $^{11}\text{B}$  NMR (225 MHz,  $\text{C}_6\text{D}_6$ ) spectrum of MC-BN5.

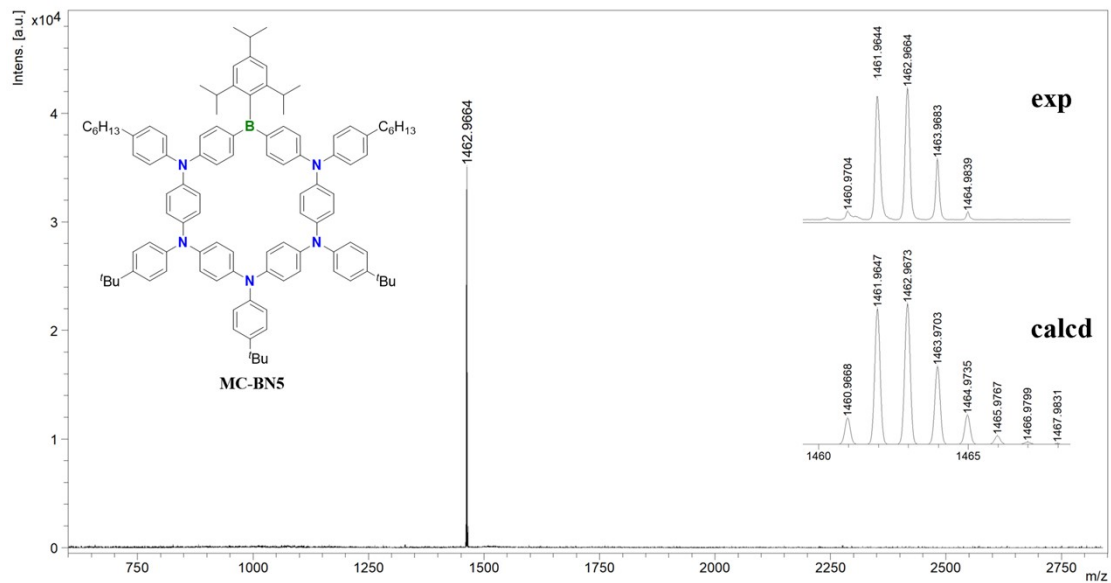

**Figure S8.** MALDI-TOF spectra (positive) of **MC-BN5**. Inset: experimental and simulated isotopic patterns.

### 3.4 NMR Spectra of 3

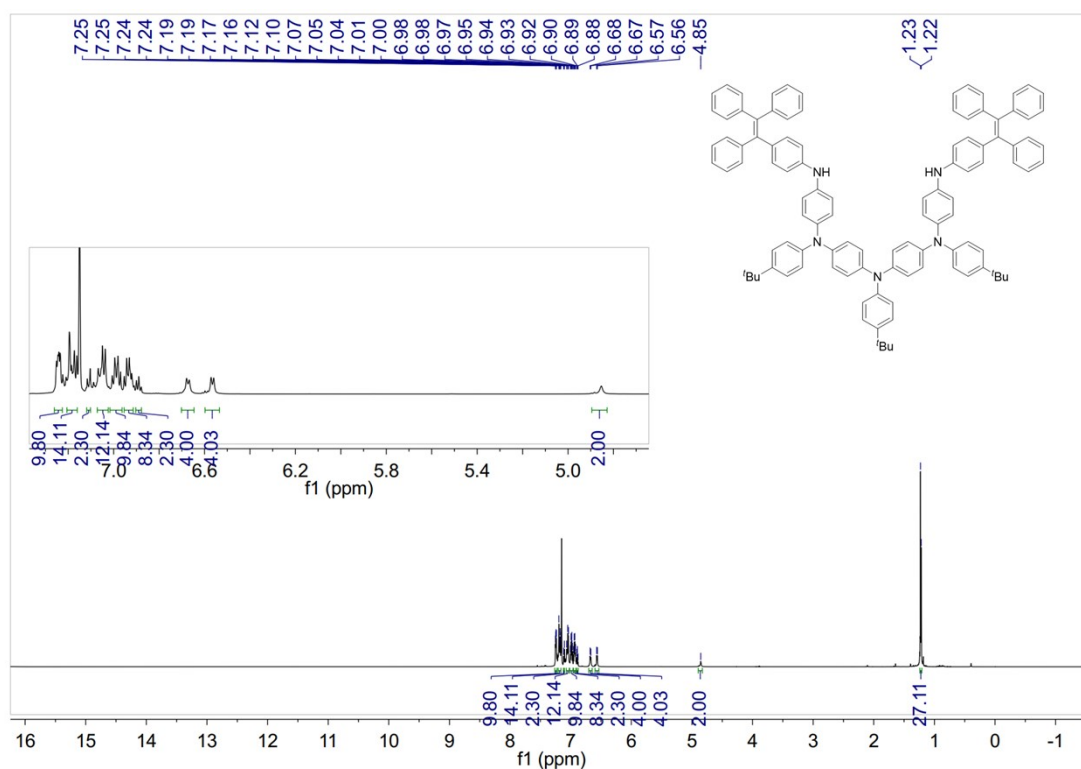

**Figure S9.**  $^1\text{H}$  NMR (700 MHz,  $\text{C}_6\text{D}_6$ ) spectrum of **3**.

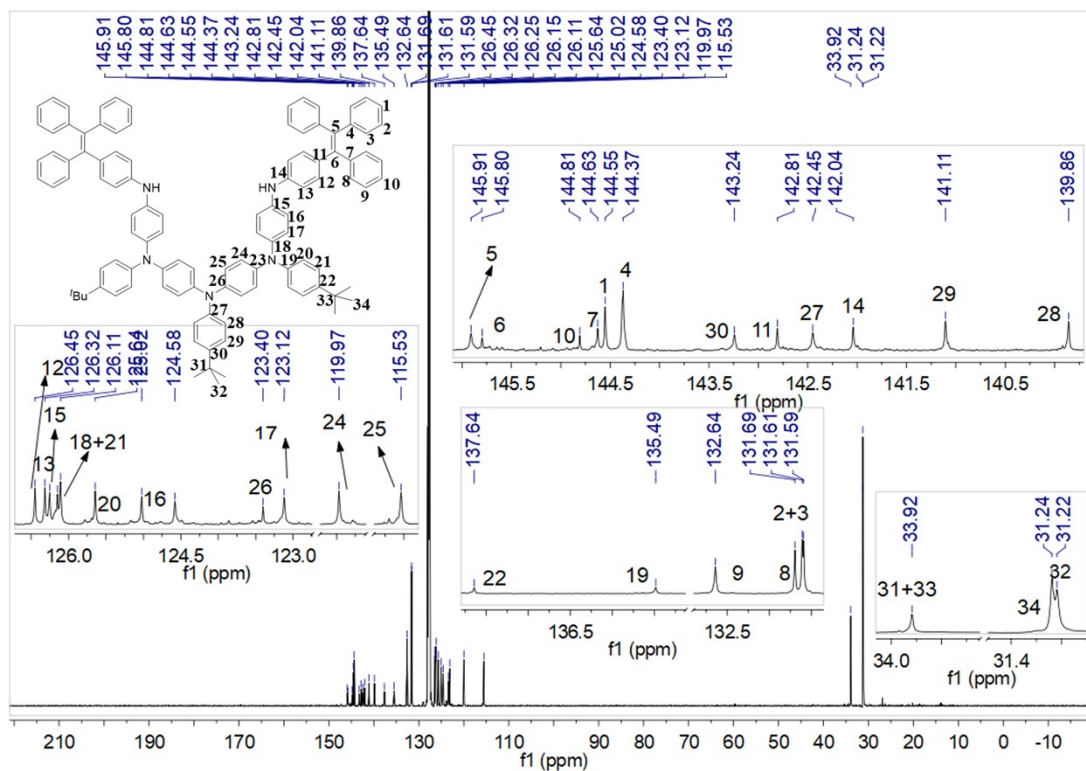

Figure S10.  $^{13}\text{C}$  NMR (176 MHz,  $\text{C}_6\text{D}_6$ ) spectrum of **3**.

### 3.5 NMR Spectra of 5

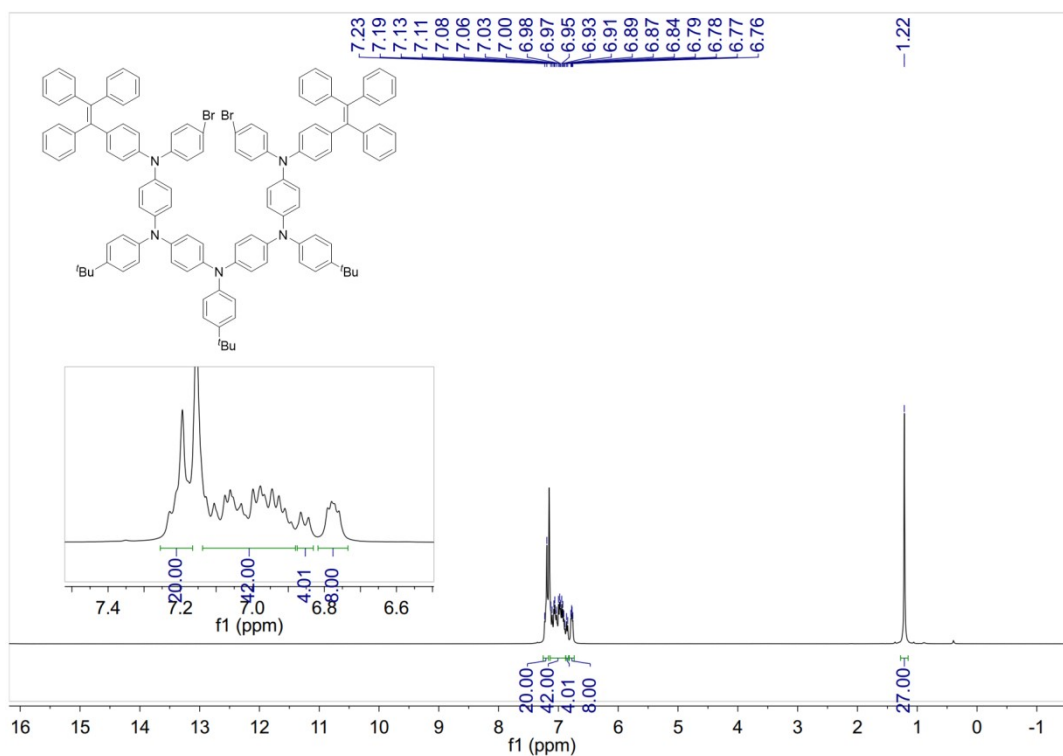

Figure S11.  $^1\text{H}$  NMR (400 MHz,  $\text{C}_6\text{D}_6$ ) spectrum of **5**.

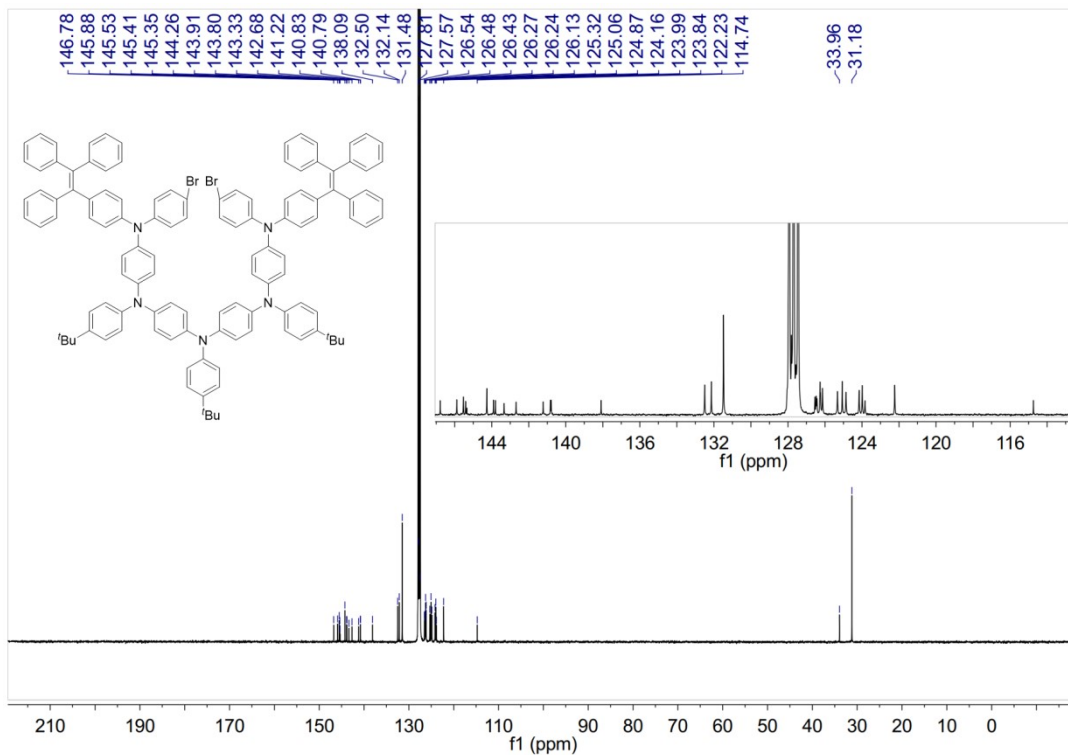

Figure S12.  $^{13}\text{C}$  NMR (101 MHz,  $\text{C}_6\text{D}_6$ ) spectrum of 5.

### 3.6 NMR Spectra of MC-ABN5

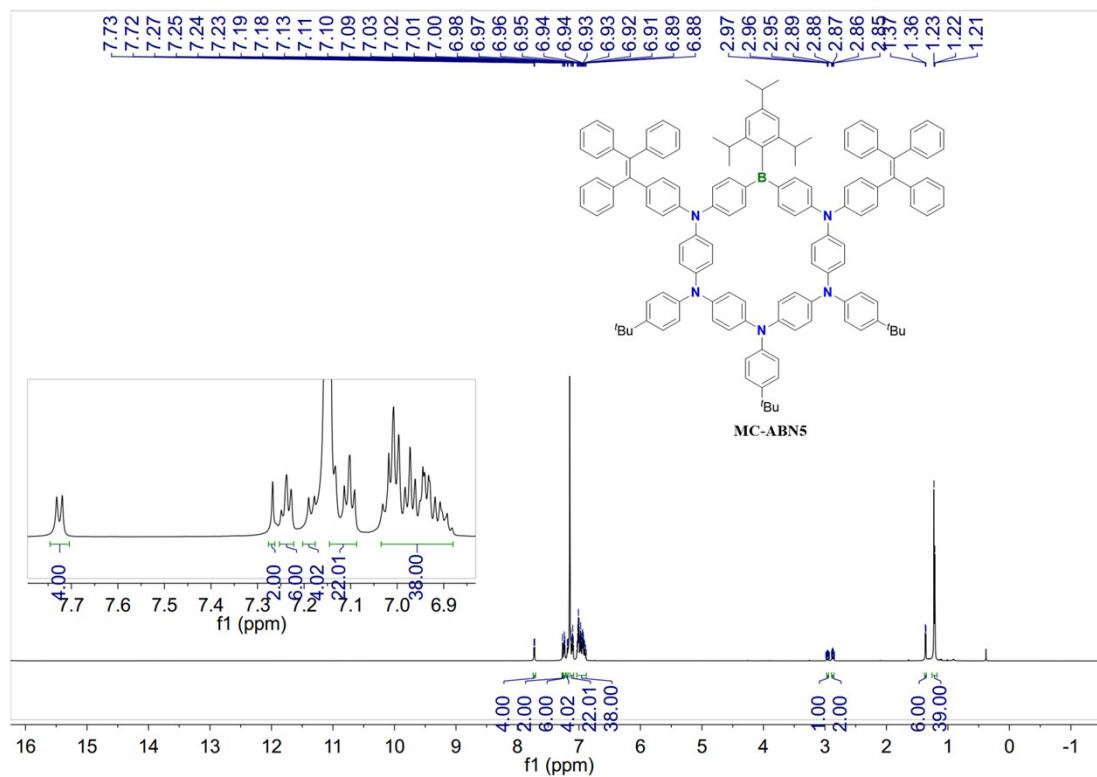

Figure S13.  $^1\text{H}$  NMR (700 MHz,  $\text{C}_6\text{D}_6$ ) spectrum of MC-ABN5.



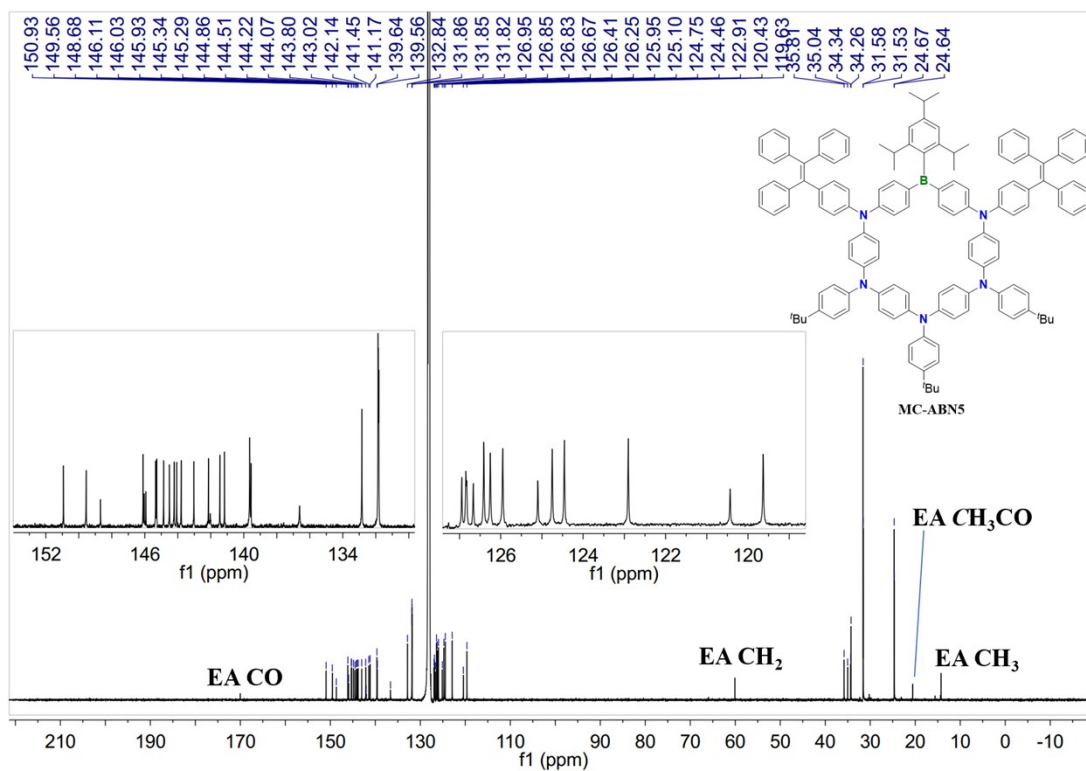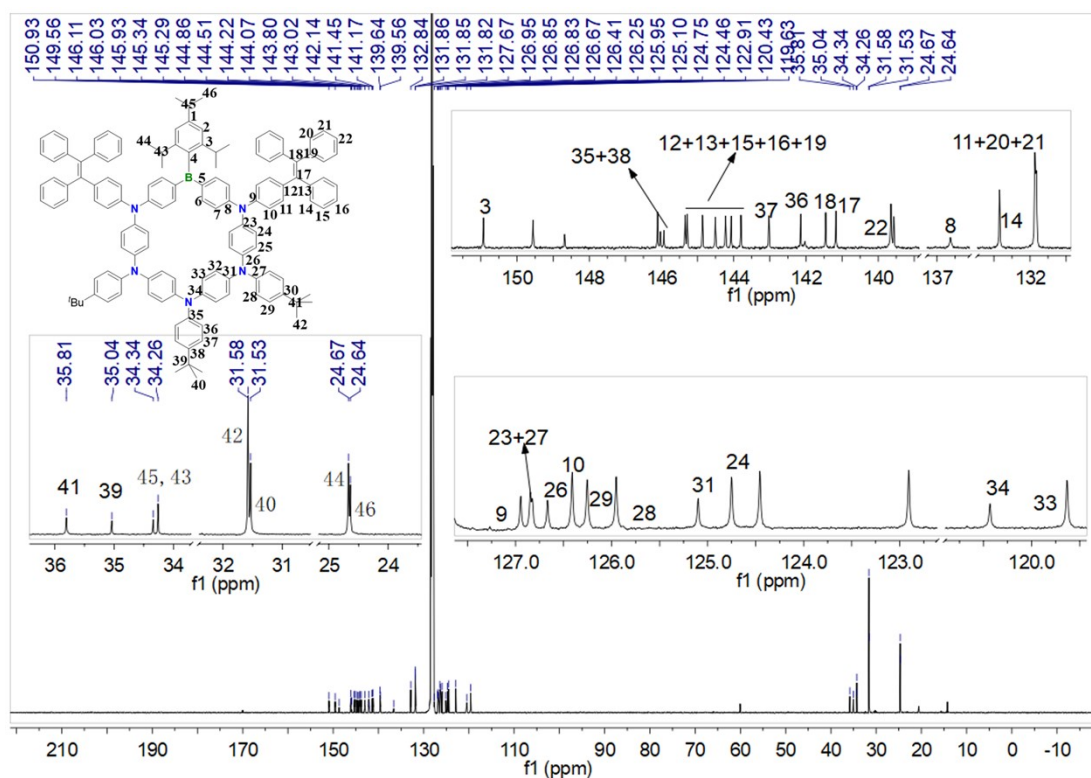

**Figure S14.** <sup>13</sup>C NMR (176 MHz, C<sub>6</sub>D<sub>6</sub>) spectrum of MC-ABN<sub>5</sub>.

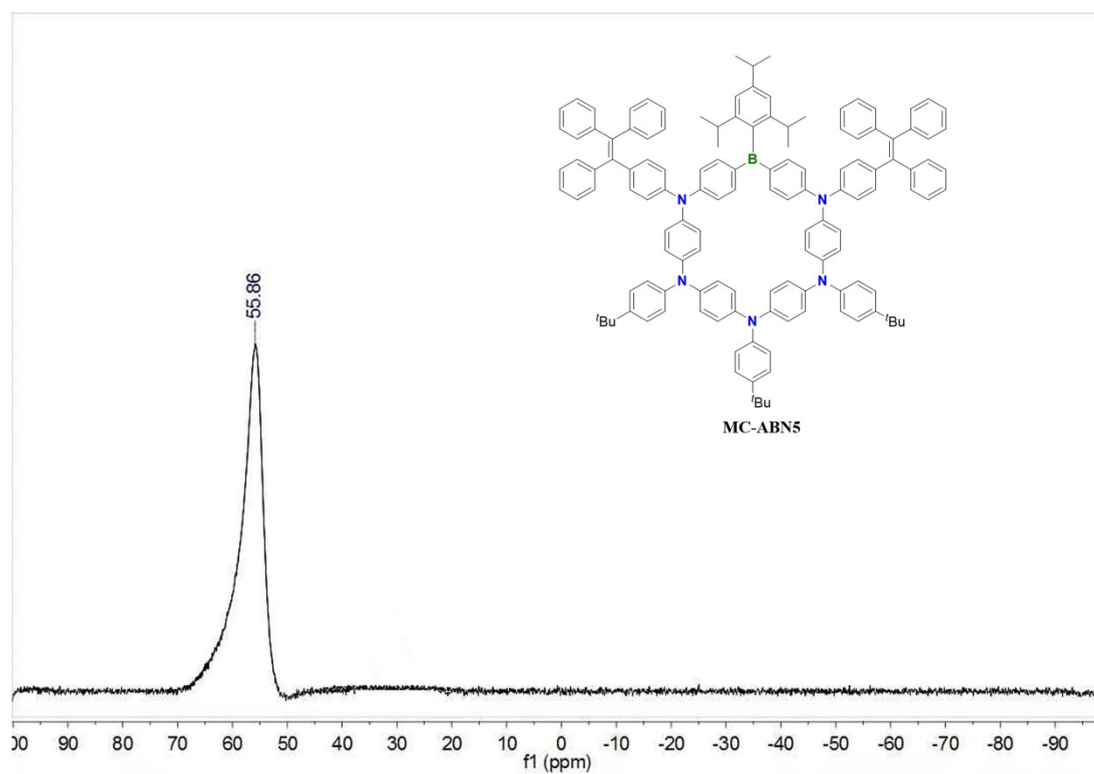

**Figure S15.**  $^{11}\text{B}$  NMR (225 MHz,  $\text{C}_6\text{D}_6$ ) spectrum of MC-ABN5.

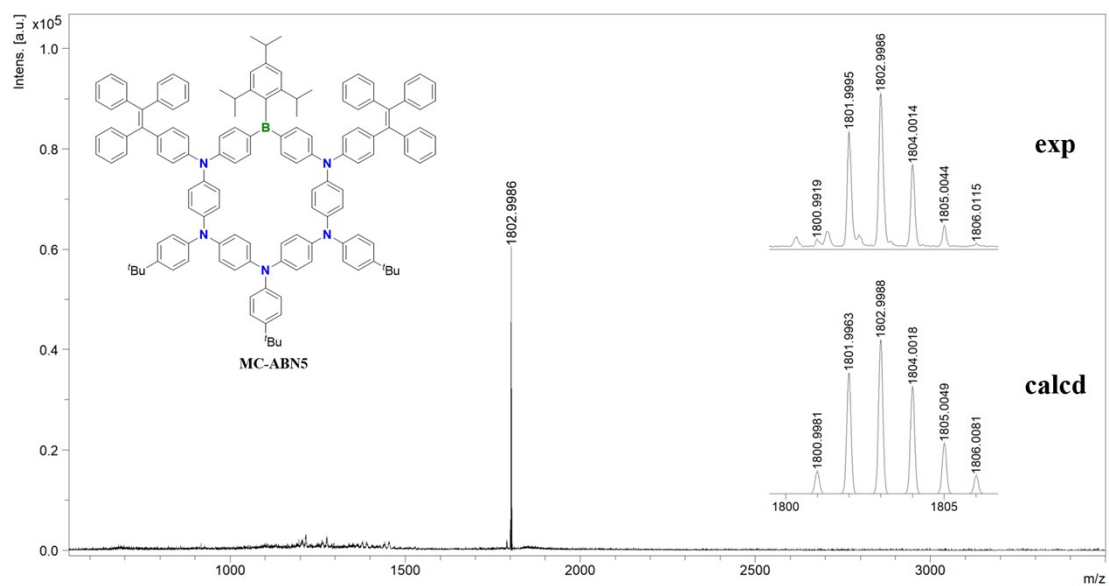

**Figure S16.** MALDI-TOF spectra (positive) of MC-ABN5. Inset: experimental and simulated isotopic patterns.

## 4. Electrochemical Data

**Table S1.** Summary of the electrochemical data of **MC-BN5**.

|               | $E_{\text{red}}^{\text{CV},a}$<br>(V) | $E_{\text{red}}^{\text{DPV},b}$<br>(V) | $E_{\text{ox}}^{\text{CV},c}$<br>(V) | $E_{\text{ox}}^{\text{DPV},d}$<br>(V) | $E_{\text{HOMO/LUMO}}^e$<br>(eV) | $E_{\text{gap(elec)}}^f$<br>(eV) |
|---------------|---------------------------------------|----------------------------------------|--------------------------------------|---------------------------------------|----------------------------------|----------------------------------|
| <b>MC-BN5</b> | -2.66                                 | -2.66                                  | -0.16, 0.08,<br>0.34, 0.65, 1.14     | -0.16, 0.07,<br>0.33, 0.64, 1.12      | -4.64/-2.14                      | 2.50                             |

Cyclic and differential pulse voltammetry (CV and DPV) curves (vs Fc/Fc<sup>+</sup>), using *n*-Bu<sub>4</sub>NPF<sub>6</sub> (0.1 M) as the electrolyte,  $\nu = 100$  mV/s. <sup>a</sup> Reduction potential from cyclic voltammetry (CV), <sup>b</sup> Peak potentials determined by the reduction peak positions from differential pulse voltammetry (DPV). <sup>c</sup> Oxidation potentials from CV. <sup>d</sup> Peak potentials determined by the oxidation peak positions from DPV. <sup>e</sup> The HOMO and LUMO energy levels are obtained by DPV,  $E_{\text{LUMO}}/E_{\text{HOMO}} = - (4.8 + E_{\text{red(DPV)}}^l/E_{\text{ox(DPV)}}^l)$ . <sup>f</sup> The electrochemical energy gap,  $E_{\text{gap(elec)}} = E_{\text{LUMO}} - E_{\text{HOMO}}$ .

## 5. Photophysical Measurements

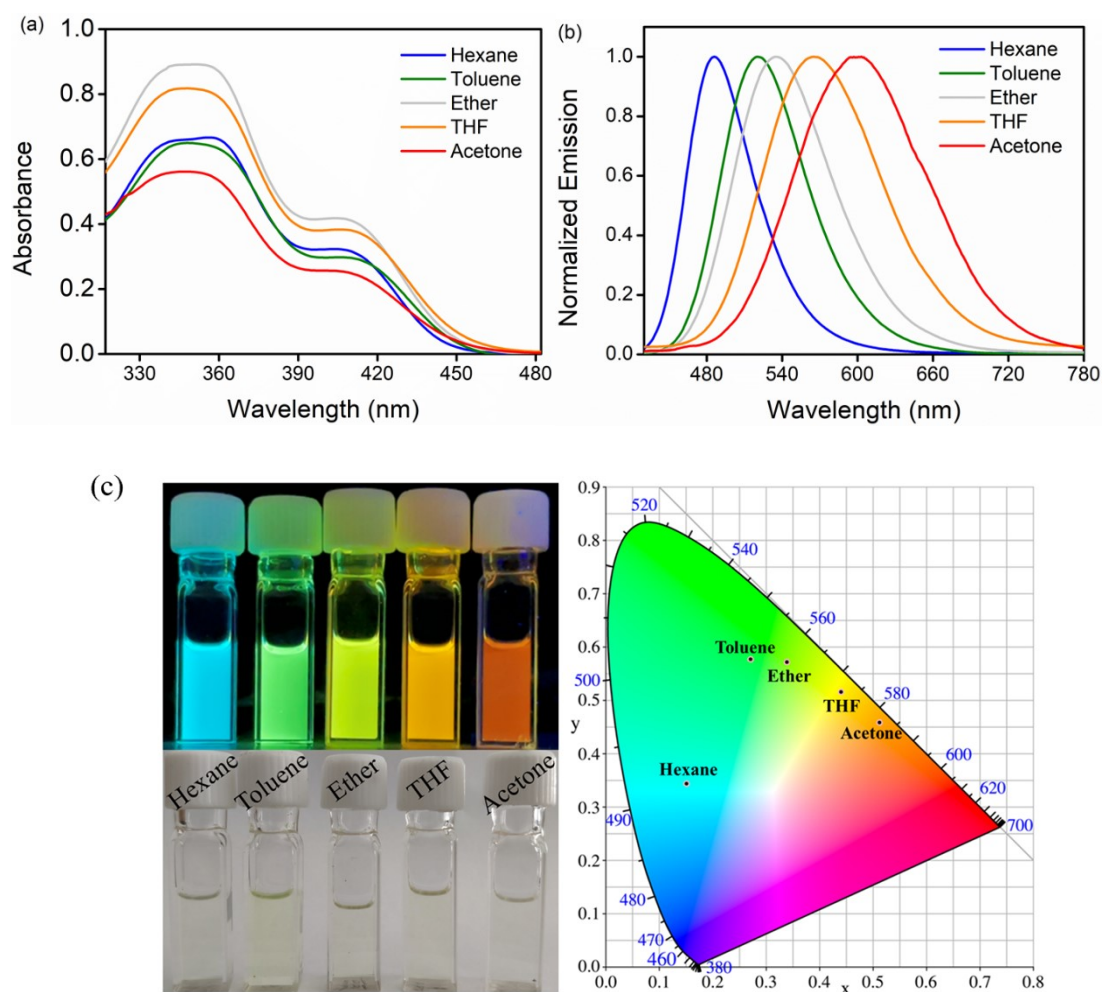

**Figure S17.** (a) UV/vis absorption and (b) emission spectra for **MC-BN5** in solvents of different polarity ( $c = 1.0 \times 10^{-5}$  M). (c) Photographs showing the emission colors under the 365 nm UV lamp and CIE color coordinates.

**Table S2.** Photophysical data of **MC-BN5** in different solvents.

|                                 | $\lambda_{\text{abs}}/\text{nm}$ | $\lambda_{\text{em}}/\text{nm}$ | $\Phi_{\text{F}}/\%$ | $\tau/\text{ns}$ |
|---------------------------------|----------------------------------|---------------------------------|----------------------|------------------|
| Hexane                          | 356, 407                         | 486                             | 52                   | 5                |
| Toluene                         | 349, 408                         | 520                             | 66                   | 7                |
| Ether                           | 348, 407                         | 535                             | 60                   | 10               |
| THF                             | 345, 408                         | 565                             | 36                   | 8                |
| CH <sub>2</sub> Cl <sub>2</sub> | 347, 408                         | 597                             | 16                   | 4                |
| Acetone                         | 346, 407                         | 603                             | 5                    | 7                |

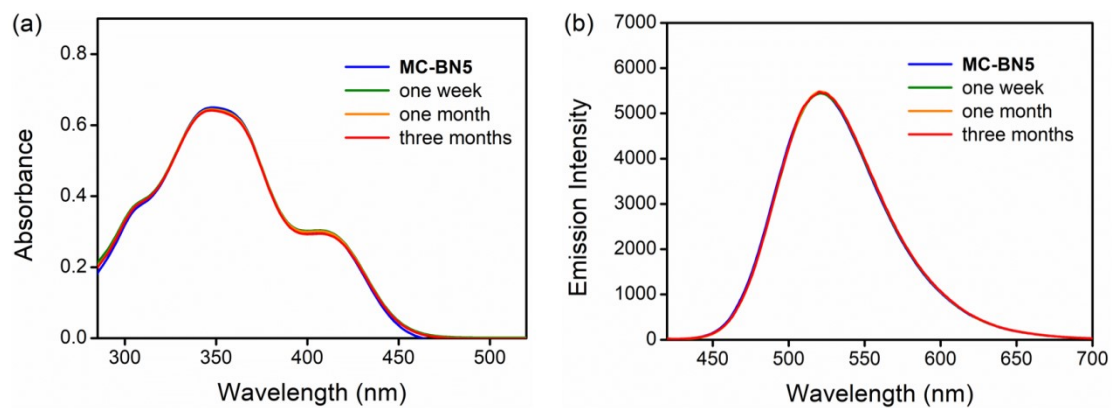

**Figure S18.** (a) UV-Vis absorption and (b) emission spectra of **MC-BN5** in toluene ( $c = 1.0 \times 10^{-5}$  M,  $\lambda_{\text{ex}} = 408$  nm) at ambient conditions under air over a time period of three months.

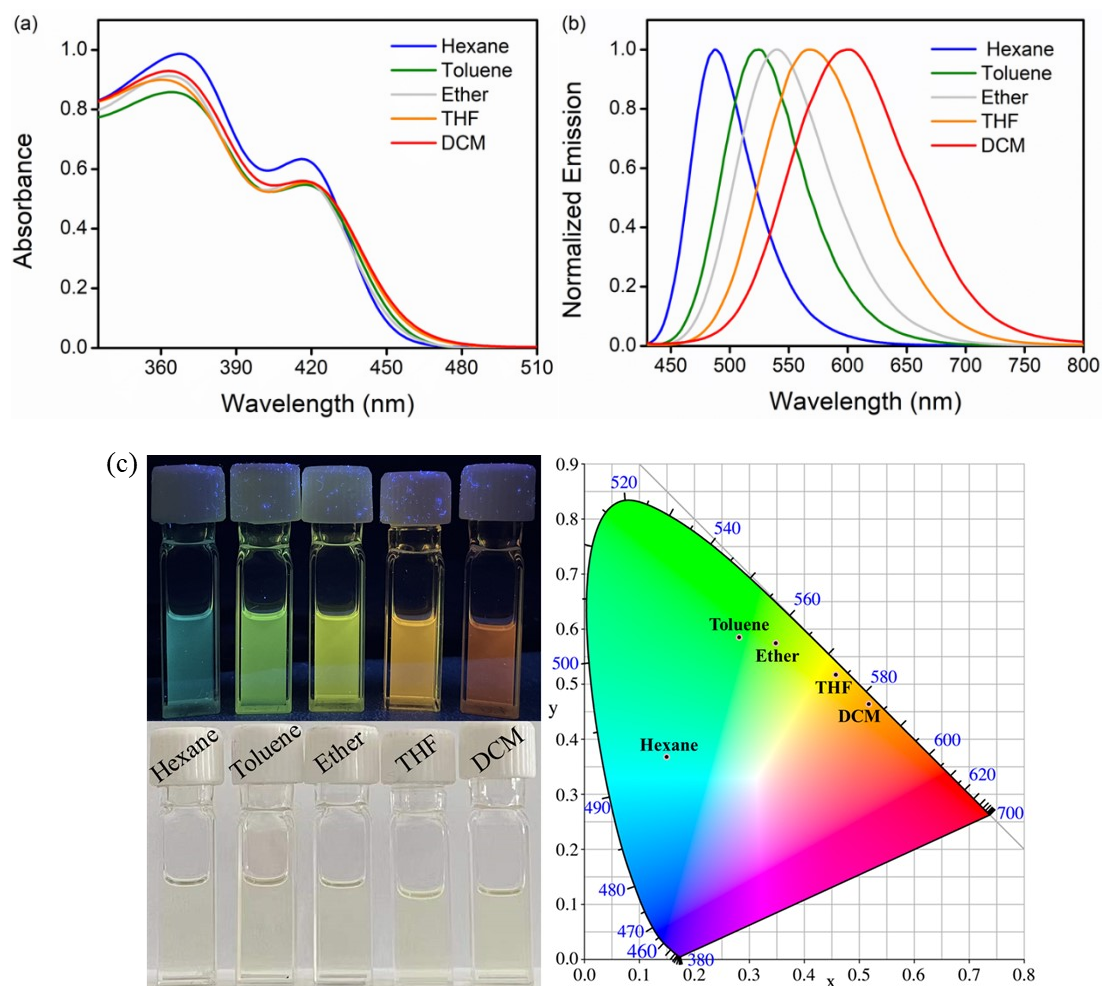

**Figure S19.** (a) UV-Vis absorption and (b) emission spectra for **MC-ABN5** in solvents of different polarity ( $c = 1.0 \times 10^{-5}$  M). (c) Photographs showing the emission colors under the 365 nm UV lamp and CIE color coordinates.

**Table S3.** Photophysical data of **MC-ABN5** in different solvents.

|                                 | $\lambda_{\text{abs}}/\text{nm}$ | $\lambda_{\text{em}}/\text{nm}$ | $\Phi_{\text{f}}/\%$ | $\tau/\text{ns}$ |
|---------------------------------|----------------------------------|---------------------------------|----------------------|------------------|
| Hexane                          | 368, 416                         | 488                             | 6                    | 2                |
| Toluene                         | 365, 418                         | 525                             | 18                   | 3                |
| Ether                           | 364, 416                         | 540                             | 23                   | 4                |
| THF                             | 362, 418                         | 568                             | 25                   | 6                |
| CH <sub>2</sub> Cl <sub>2</sub> | 364, 417                         | 600                             | 10                   | 3                |

**Table S4.** Photophysical properties of **MC-BN5** and **MC-ABN5** in different solvents.

$$\Delta\nu = \frac{2(\Delta\mu)^2}{hca^3} \Delta f + \text{constant}$$

$$\Delta f = \frac{\varepsilon-1}{2\varepsilon+1} - \frac{n^2-1}{2n^2+1}$$

| Entry | Solvent                         | $\varepsilon^a$ | $n^b$ | $\Delta f^c$ | <b>MC-BN5</b>                       |                                    |                                         |
|-------|---------------------------------|-----------------|-------|--------------|-------------------------------------|------------------------------------|-----------------------------------------|
|       |                                 |                 |       |              | $\lambda_{\text{abs}}^d(\text{nm})$ | $\lambda_{\text{em}}^e(\text{nm})$ | $\Delta\nu^f \text{cm}^{-1}(\text{nm})$ |
| 1     | Hexane                          | 1.88            | 1.372 | 0.001        | 356                                 | 486                                | 7514 (130)                              |
| 2     | Toluene                         | 2.37            | 1.496 | 0.0126       | 349                                 | 520                                | 9423 (171)                              |
| 3     | Ether                           | 4.34            | 1.353 | 0.1668       | 348                                 | 535                                | 10044(187)                              |
| 4     | THF                             | 7.58            | 1.404 | 0.2107       | 345                                 | 565                                | 11286(220)                              |
| 5     | CH <sub>2</sub> Cl <sub>2</sub> | 10.37           | 1.424 | 0.2276       | 347                                 | 597                                | 12068(250)                              |
| 6     | Acetone                         | 20.70           | 1.358 | 0.2846       | 346                                 | 603                                | 12318(257)                              |
| Entry | Solvent                         | $\varepsilon^a$ | $n^b$ | $\Delta f^c$ | <b>MC-ABN5</b>                      |                                    |                                         |
|       |                                 |                 |       |              | $\lambda_{\text{abs}}(\text{nm})$   | $\lambda_{\text{em}}(\text{nm})$   | $\Delta\nu \text{cm}^{-1}(\text{nm})$   |
| 1     | Hexane                          | 1.88            | 1.372 | 0.001        | 368                                 | 488                                | 6682 (120)                              |
| 2     | Toluene                         | 2.37            | 1.496 | 0.0126       | 365                                 | 525                                | 8350 (160)                              |
| 3     | Ether                           | 4.34            | 1.353 | 0.1668       | 364                                 | 540                                | 8954 (176)                              |
| 4     | THF                             | 7.58            | 1.404 | 0.2107       | 362                                 | 568                                | 10019(206)                              |
| 5     | CH <sub>2</sub> Cl <sub>2</sub> | 10.37           | 1.424 | 0.2276       | 364                                 | 600                                | 10806(236)                              |
| 6     | Acetone                         | 20.70           | 1.358 | 0.2846       | –                                   | –                                  | –                                       |

<sup>a</sup>  $\varepsilon$  = solvent dielectric constant

<sup>b</sup>  $n$  = index of refraction

<sup>c</sup>  $\Delta f$  = the orientation polarizability

<sup>d</sup>  $\lambda_{\text{abs}}$  = absorption maximum wavelength (nm)

<sup>e</sup>  $\lambda_{\text{em}}$  = emission maximum wavelength (nm)

<sup>f</sup>  $\Delta\nu$  = Stokes shifts (cm-1 or nm)

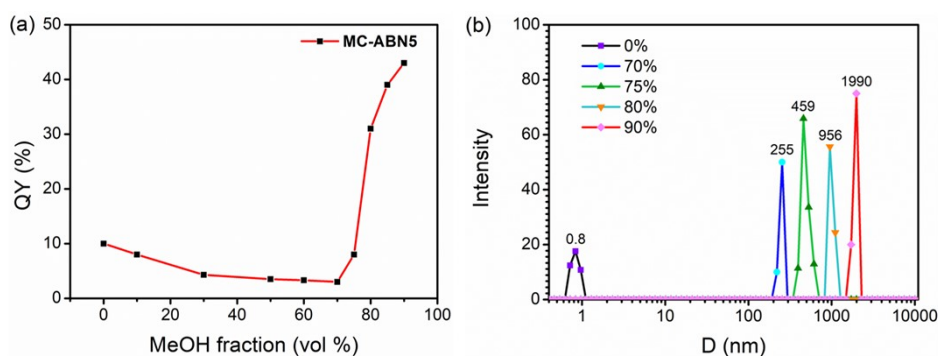

**Figure S20.** AIE behavior of **MC-ABN5**: (a) Change of the fluorescence quantum yields (QY) with increasing  $f_{\text{MeOH}}$ . (b) Selected DLS size distribution at different ratios of  $f_{\text{MeOH}}$ .

**Table S5.** Comparison of the photophysical, computational and electrochemical data for **MC-BN5**, **MC-ABN5** and related boracyclophanes.

|                                            | $\lambda_{\text{abs}}^{\text{a}}$<br>(nm) | $\lambda_{\text{em}}^{\text{a}}$<br>(nm) | $E_{\text{HOMO}}^{\text{b}}$<br>(eV) | $E_{\text{LUMO}}^{\text{c}}$<br>(eV) | $E_{\text{gap(DFT)}}^{\text{d}}$<br>(eV) | $E_{\text{TDDFT}}^{\text{e}}$<br>(eV) | $E_{\text{gap(optical)}}^{\text{f}}$<br>(eV) | $E^{\text{ox}1/2^{\text{g}}}$<br>(V) | $E^{\text{red}1/2^{\text{g}}}$<br>(V) | $E_{\text{gap(elec)}}$<br>(eV) |
|--------------------------------------------|-------------------------------------------|------------------------------------------|--------------------------------------|--------------------------------------|------------------------------------------|---------------------------------------|----------------------------------------------|--------------------------------------|---------------------------------------|--------------------------------|
| <b>MC-BN5</b>                              | 408                                       | 520                                      | -4.34                                | -1.32                                | 3.02                                     | 2.73                                  | 2.70                                         | -0.16                                | -2.66                                 | 2.50                           |
| <b>MC-ABN5</b>                             | 418                                       | 525                                      | –                                    | –                                    | –                                        | –                                     | 2.63                                         | –                                    | –                                     | –                              |
| <b>M1<sup>h</sup></b>                      | 348                                       | –                                        | –                                    | –                                    | –                                        | –                                     | –                                            | -0.28                                | –                                     | –                              |
| <b>M2<sup>i</sup></b>                      | 420                                       | 460                                      | -5.01                                | -1.69                                | 3.32                                     | –                                     | –                                            | +0.46                                | -2.53                                 | 2.99                           |
| <b>M3<sup>j</sup></b>                      | 302                                       | 427                                      | -7.02                                | -2.91                                | 4.11                                     | –                                     | –                                            | –                                    | -1.56                                 | –                              |
| <b>M4<sup>k</sup></b>                      | 416                                       | 612                                      | -4.62                                | -2.02                                | 2.60                                     | 2.30                                  | 2.51                                         | +0.02                                | -2.10                                 | 1.93                           |
| <b>MC-B6-Flu<sup>l</sup></b>               | 366                                       | 425                                      | -5.69                                | -2.20                                | 3.49                                     | –                                     | –                                            | –                                    | -2.10                                 | –                              |
| <b>MC-B4N2<sup>m</sup></b>                 | 374                                       | 399                                      | -5.41                                | -1.87                                | 3.54                                     | –                                     | 3.22                                         | +0.95                                | -2.30                                 | 3.25                           |
| <b>MC-B4N2-<sup>F</sup>Mes<sup>n</sup></b> | 406                                       | 483                                      | -5.33                                | -2.29                                | 3.04                                     | –                                     | 3.05                                         | +0.74                                | -2.02                                 | 2.76                           |

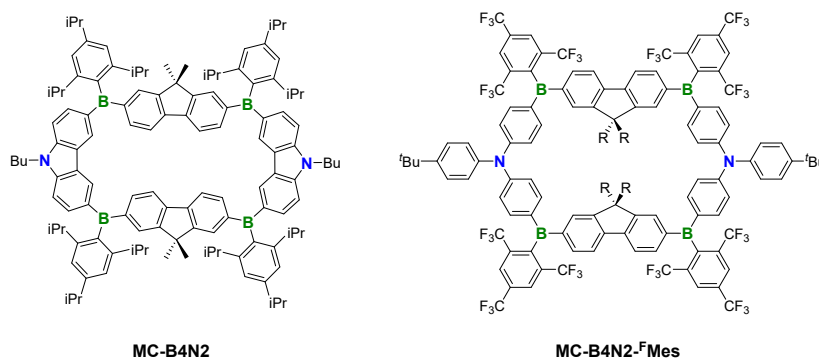

[a] Recorded in toluene ( $c = 1.0 \times 10^{-5}$  M). [b]  $E_{\text{HOMO}}$ : obtained by DFT calculation (B3LYP, 6-31G\*). [c]  $E_{\text{LUMO}}$  obtained by DFT calculation (B3LYP, 6-31G\*). [d] Energy gaps:  $E_{\text{gap}} = E_{\text{LUMO}} - E_{\text{HOMO}}$  obtained by DFT calculation (B3LYP, 6-31G\*). [e] Vertical excitation of the lowest transition ( $S_0 \rightarrow S_1$ ) calculated by TD-DFT (B3LYP, 6-311G\*). [f]  $E_{\text{gap(optical)}}$ : experimental optical energy gap obtained from the onset of absorption spectra in toluene. [g]  $E^{\text{ox}1/2}$  and  $E^{\text{red}1/2}$ : half-wave potential of oxidation and reduction in  $\text{CH}_2\text{Cl}_2$  determined by cyclic voltammetry (vs  $\text{Fc}^+/\text{Fc}$ ). [h] Ref S3a. [i] Ref S3b. [j] Ref S3c. [k] Ref S2c. [l] Ref S3d. [m] Ref S3e. [n] Ref S3f. Inset: structures of **MC-B4N2** and **MC-B4N2-<sup>F</sup>Mes**.

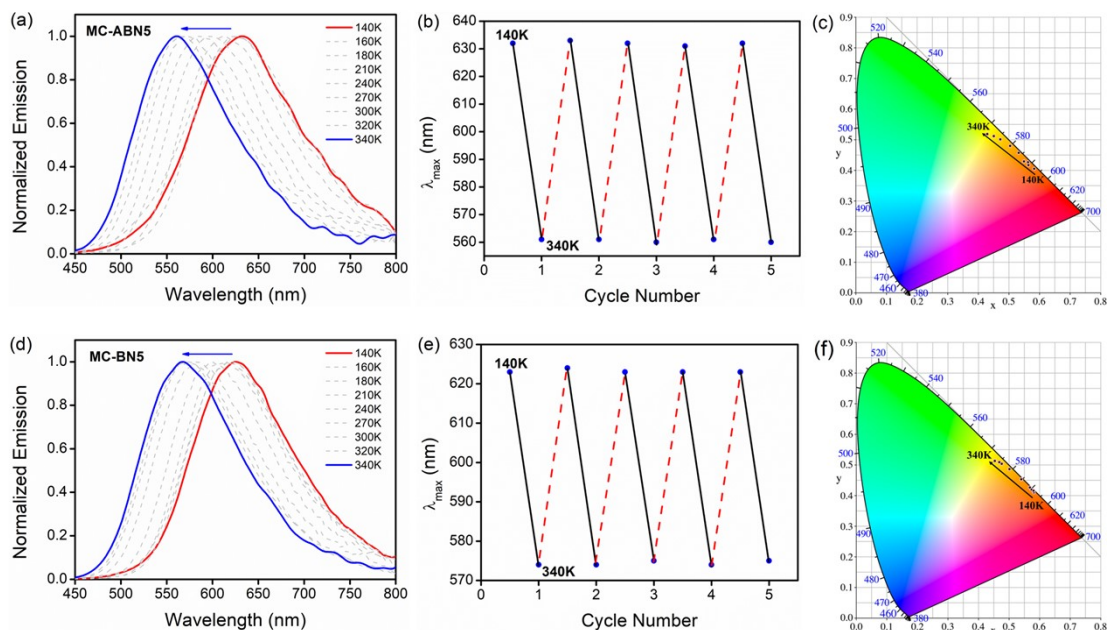

**Figure S21.** (a, d) Temperature-dependent emission spectra for MC-ABN5 and MC-BN5 in 2-methyltetrahydrofuran between 140 and 340 K under  $\text{N}_2$  ( $c = 1.0 \times 10^{-5}$  M,  $\lambda_{\text{ex}} = 418$  nm for MC-ABN5 and 408 nm for MC-BN5). (b, e) Reversible emission modulation with cycling T changes. (c, f) CIE color coordinates.

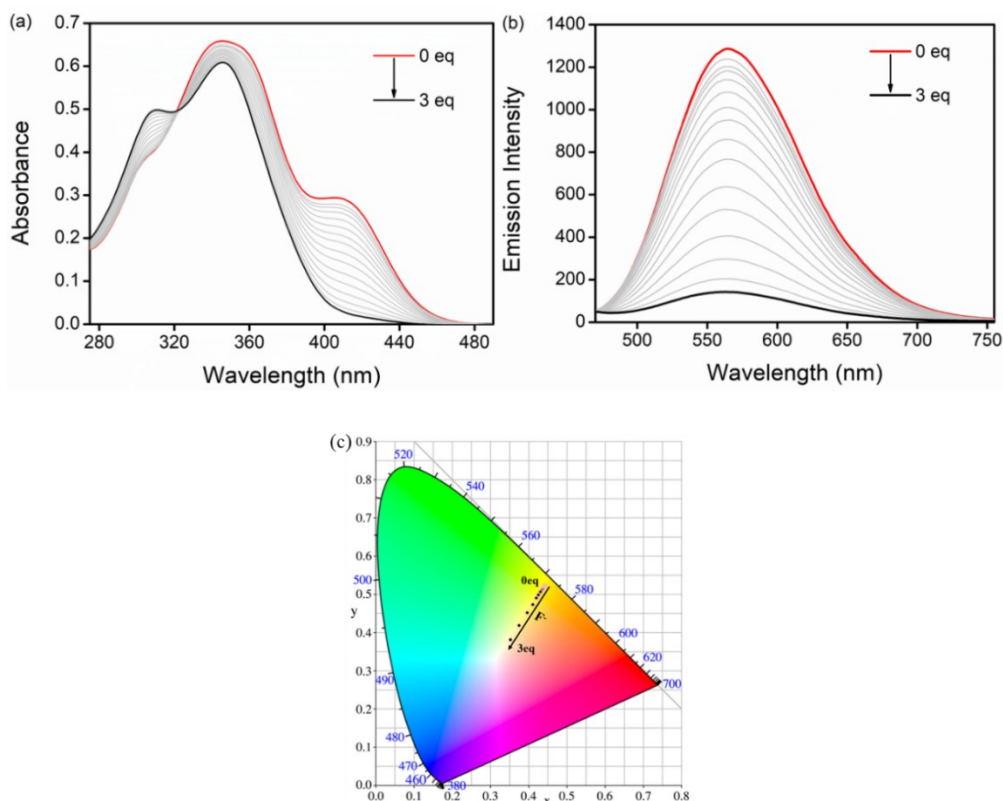

**Figure S22.** (a) UV-Vis absorption and (b) emission spectra for MC-BN5 ( $c = 1.0 \times 10^{-5}$  M, in THF) as addition of TBAF and (c) CIE diagram showing the emission color changes in response to addition of  $\text{F}^-$ .



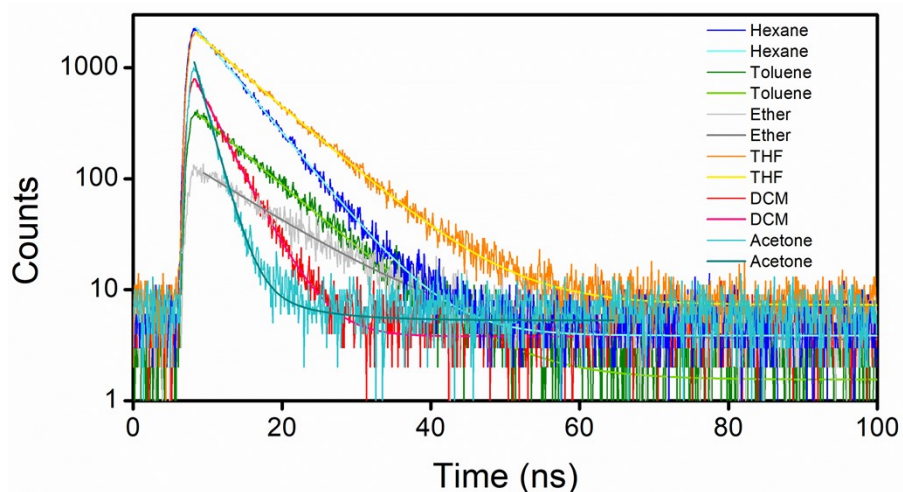

**Figure S23.** PL decay-fitting curves of **MC-BN5** in solvents of different polarity ( $c = 1.0 \times 10^{-5}$  M).

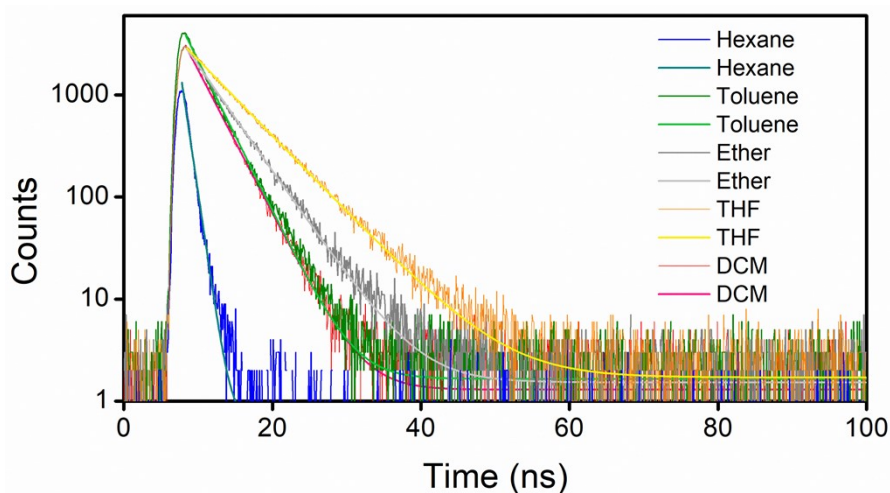

**Figure S24.** PL decay-fitting curves of **MC-ABN5** in solvents of different polarity ( $c = 1.0 \times 10^{-5}$  M).

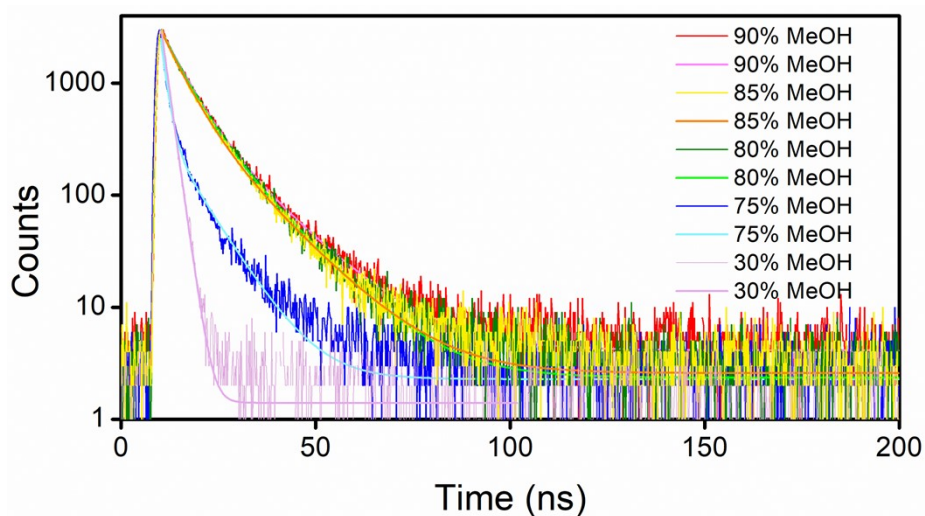

**Figure S25.** PL decay-fitting curves of **MC-ABN5** ( $c = 1.0 \times 10^{-5}$  M) in  $\text{CH}_2\text{Cl}_2$  with different  $f_{\text{MeOH}}$ .

**Table S6.** Summary of emission photophysical properties of **MC-ABN5** ( $c = 1.0 \times 10^{-5}$  M) in  $\text{CH}_2\text{Cl}_2$  with different  $f_{\text{MeOH}}$ .

|          | $\lambda_{\text{em}}$ [nm] | $\Phi_{\text{F}}$ (%) | $\tau$ [ns] |          |                     | Rel %       | $x^2$ |
|----------|----------------------------|-----------------------|-------------|----------|---------------------|-------------|-------|
|          |                            |                       | $\tau_1$    | $\tau_2$ | $\tau_{\text{ave}}$ |             |       |
| 90% MeOH | 532                        | 43                    | 5.49        | 13.54    | 9.04                | 55.92/44.08 | 1.183 |
| 85% MeOH | 533                        | 39                    | 5.13        | 12.61    | 8.50                | 55.03/44.97 | 1.202 |
| 80% MeOH | 538                        | 31                    | 5.08        | 12.06    | 8.50                | 50.87/49.13 | 1.244 |
| 75% MeOH | 539                        | 8                     | 1.40        | 7.79     | 4.35                | 53.89/46.11 | 1.295 |
| 30% MeOH | 600                        | 4                     | 1.72        | -        | 1.72                | 100         | 1.001 |

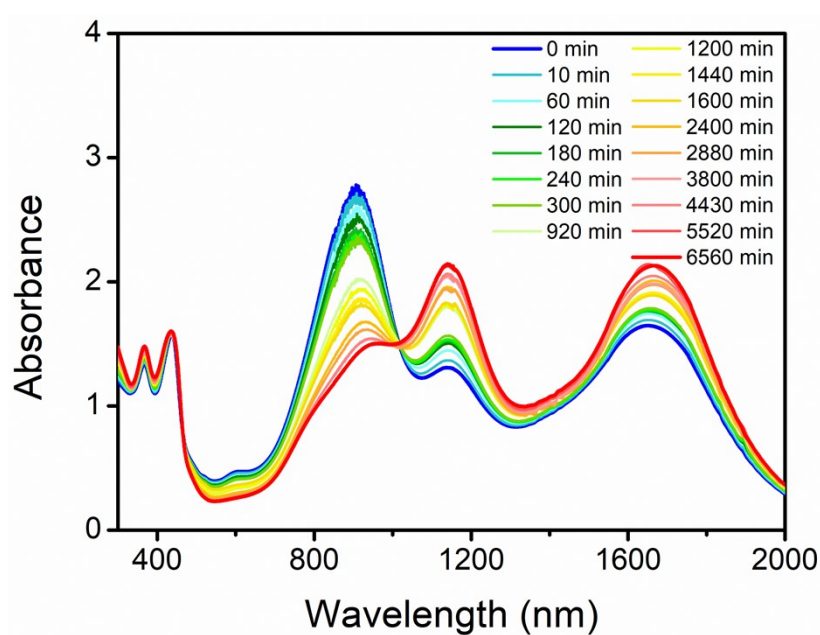

**Figure S26.** Time dependent spectra of fully oxidized **MC-BN5** ( $c = 5.0 \times 10^{-5}$  M) monitored by UV-Vis-NIR absorption spectra in dry  $\text{CH}_2\text{Cl}_2$  under air.

## 6. DFT and TD-DFT Computations

DFT and TD-DFT calculations were performed using the Gaussian 09 suite of programs.<sup>[4]</sup> Geometry optimizations and vertical excitations of all compounds were obtained at the (DFT) B3LYP/6-31G\*, (TD-DFT) B3LYP/6-311G\* and (TD-DFT) CAM-B3LYP/6-311G\* and level of theory,<sup>[5,6]</sup> and the resulting structures were confirmed to be stationary points through vibrational frequency analysis.

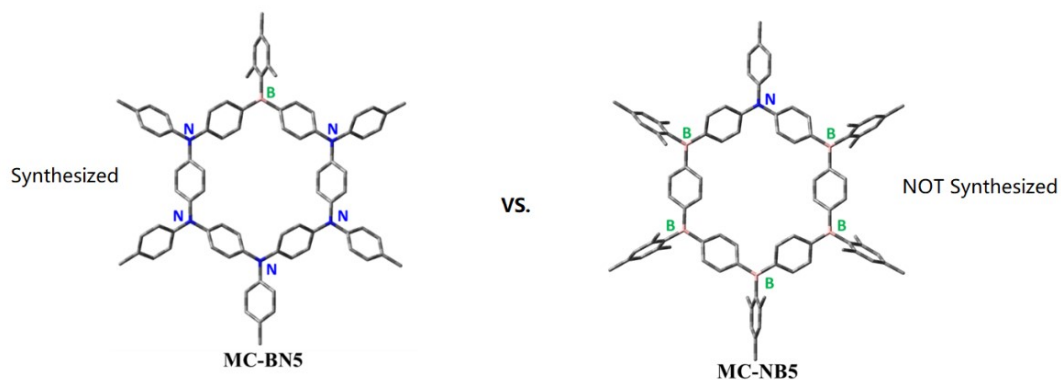

**Figure S27.** DFT-optimized structures of the simplified **MC-BN5** and **MC-NB5** (B3LYP/6-31G\*). Hydrogen atoms are omitted. The *iso*-propyl, *t*-butyl and *n*-hexyl groups are simplified as Me groups.

|                                        | DFT Structure | HOMO | LUMO | $E_{\text{gap(DFT)}}$<br>(eV) | Dipole<br>Moment<br>$\mu_{\text{g}}$ (D) |
|----------------------------------------|---------------|------|------|-------------------------------|------------------------------------------|
| <b>MC-B6</b><br>( $D_{3d}$ )           |               |      |      | 4.07                          | 0.00                                     |
| <b>MC-<i>alt</i>-B3N3</b><br>( $D_3$ ) |               |      |      | 3.32                          | 0.00                                     |
| <b>MC-<i>b</i>-B3N3</b><br>( $C_2$ )   |               |      |      | 2.60                          | 3.17                                     |
| <b>MC-NB5</b><br>( $C_2$ )             |               |      |      | 2.96                          | 1.63                                     |
| <b>MC-BN5</b><br>( $C_2$ )             |               |      |      | <b>2.94</b>                   | <b>1.77</b>                              |

**Figure S28.** Computational comparison of the model systems without any substituents on aryl

groups (B3LYP/6-31G\*).

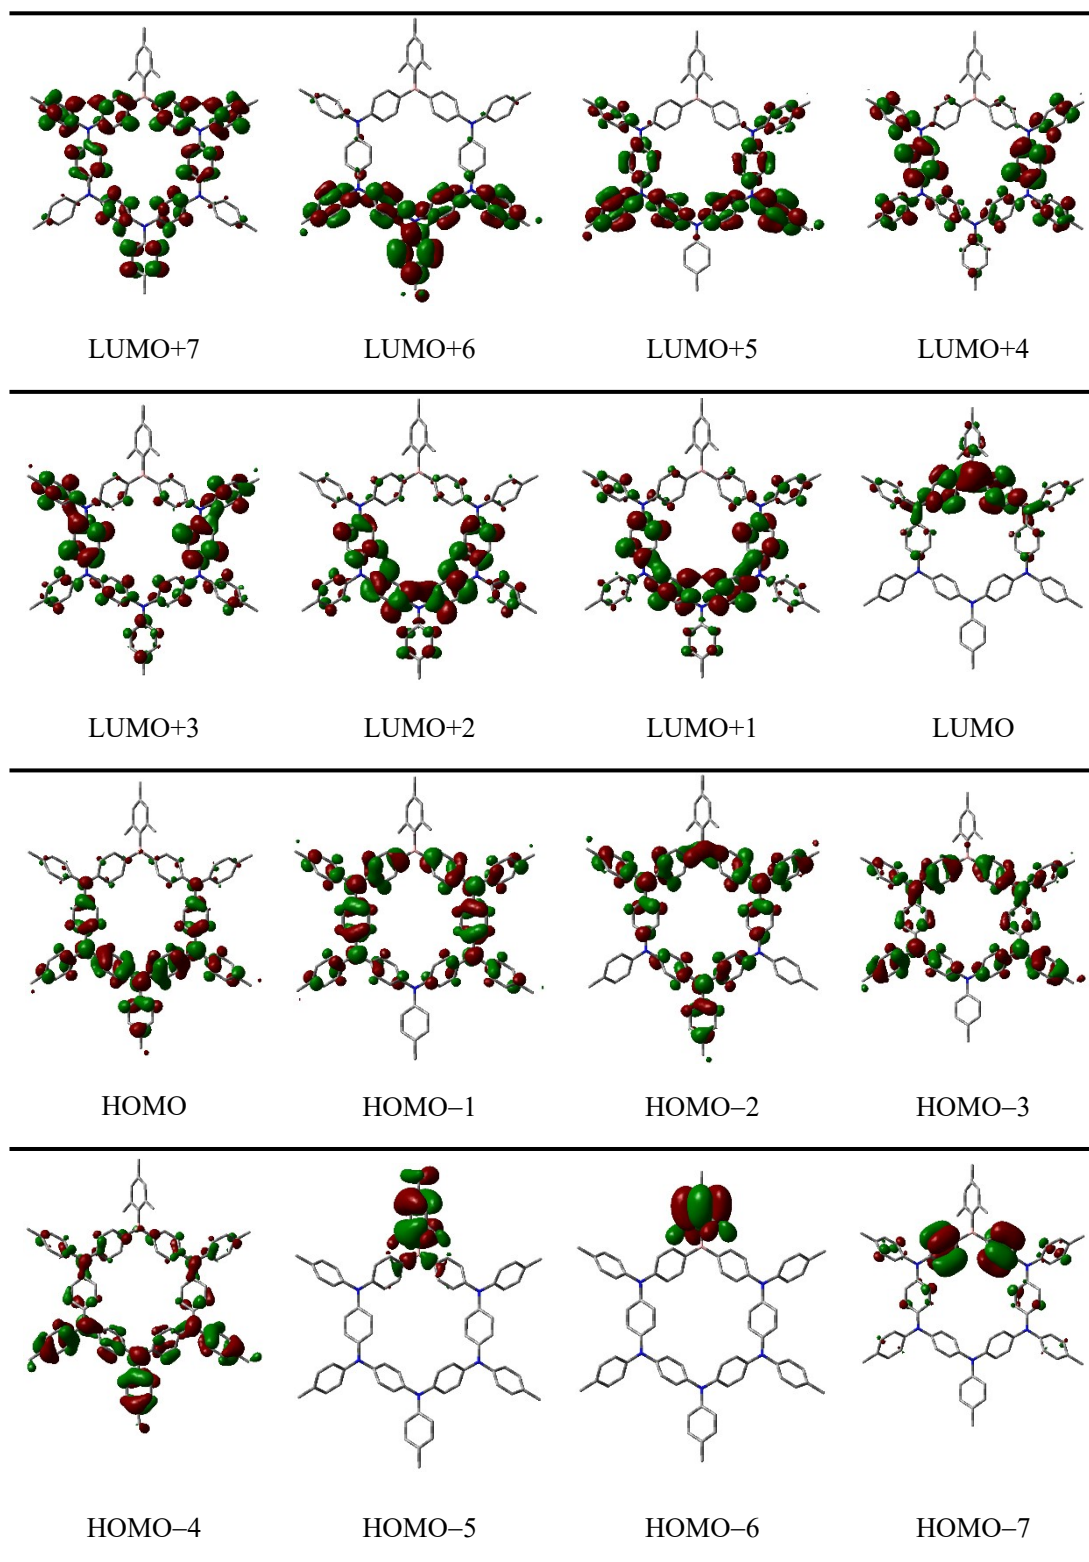

**Figure S29.** Molecular orbitals contributing to the TD-DFT calculated transitions of **MC-BN5** ( $iso = 0.02$ , B3LYP/6-31G\*). The *iso*-propyl, *t*-butyl and *n*-hexyl groups are simplified as Me groups.

**Table S7.** Summary of DFT and TD-DFT calculations for simplified **MC-BN5** and **MC-NB5**.

|               | $E_{\text{HOMO}}^a$<br>(eV) | $E_{\text{LUMO}}^a$<br>(eV) | $E_{\text{gap(DFT)}}^b$<br>(eV) | $E_{\text{TDDFT}}^c$<br>(eV) | $E_{\text{gap(optical)}}^d$<br>(eV) | $E_{\text{TDDFT/CAM}}^e$<br>(eV) |
|---------------|-----------------------------|-----------------------------|---------------------------------|------------------------------|-------------------------------------|----------------------------------|
| <b>MC-BN5</b> | -4.34                       | -1.32                       | 3.02                            | 2.73                         | 2.70                                | 3.49                             |
| <b>MC-NB5</b> | -5.26                       | -2.33                       | 2.93                            | 2.63                         | –                                   | 3.46                             |

<sup>a</sup> Obtained by DFT calculation (B3LYP, 6-31G\*). <sup>b</sup> HOMO–LUMO energy gap:  $E_{\text{gap}} = E_{\text{LUMO}} - E_{\text{HOMO}}$  (B3LYP, 6-31G\*). <sup>c</sup> Vertical excitation of the lowest energy transition ( $S_0 \rightarrow S_1$ ) calculated by TD-DFT (B3LYP, 6-311G\*). <sup>d</sup> Obtained from the onset of absorption spectra in  $\text{CH}_2\text{Cl}_2$ . <sup>e</sup> Vertical excitation of the lowest energy transition ( $S_0 \rightarrow S_1$ ) calculated by TD-DFT (CAM-B3LYP, 6-311G\*).

**Table S8.** Summary of the TD-DFT calculations (B3LYP, 6-311G\*) for the simplified **MC-BN5**.

| Compound      | Transition            | $\lambda$ , nm (eV) | Oscillator Strength, $f$ | Orbital Contributions                  |
|---------------|-----------------------|---------------------|--------------------------|----------------------------------------|
| <b>MC-BN5</b> | $S_0 \rightarrow S_1$ | 455 (2.73)          | 0.1600                   | HOMO→LUMO (99%)                        |
|               | $S_0 \rightarrow S_2$ | 443 (2.80)          | 0.3471                   | HOMO–1→LUMO (91%)                      |
|               | $S_0 \rightarrow S_3$ | 381 (3.26)          | 0.4569                   | HOMO→LUMO+1 (86%)                      |
|               | $S_0 \rightarrow S_4$ | 375 (3.30)          | 0.3305                   | HOMO→LUMO+2 (90%)                      |
|               | $S_0 \rightarrow S_5$ | 364 (3.41)          | 0.3974                   | HOMO–2→LUMO (43%)<br>HOMO→LUMO+3 (33%) |

**Table S9.** Summary of the TD-DFT calculations (CAM-B3LYP, 6-311G\*) for the simplified **MC-BN5**.

| Compound      | Transition            | $\lambda$ , nm (eV) | Oscillator Strength, $f$ | Orbital Contributions                                       |
|---------------|-----------------------|---------------------|--------------------------|-------------------------------------------------------------|
| <b>MC-BN5</b> | $S_0 \rightarrow S_1$ | 356 (3.49)          | 0.3593                   | HOMO–3→LUMO (10%)<br>HOMO–1→LUMO (60%)<br>HOMO→LUMO+1 (12%) |
|               | $S_0 \rightarrow S_2$ | 321(3.86)           | 1.1897                   | HOMO–2→LUMO (20%)<br>HOMO→LUMO (46%)                        |
|               | $S_0 \rightarrow S_3$ | 318 (3.90)          | 1.6555                   | HOMO→LUMO+1 (51%)                                           |
|               | $S_0 \rightarrow S_4$ | 310 (3.99)          | 0.1287                   | HOMO→LUMO+2 (61%)                                           |
|               | $S_0 \rightarrow S_5$ | 301 (4.12)          | 0.0866                   | HOMO–1→LUMO+2 (14%)<br>HOMO→LUMO+3 (26%)                    |

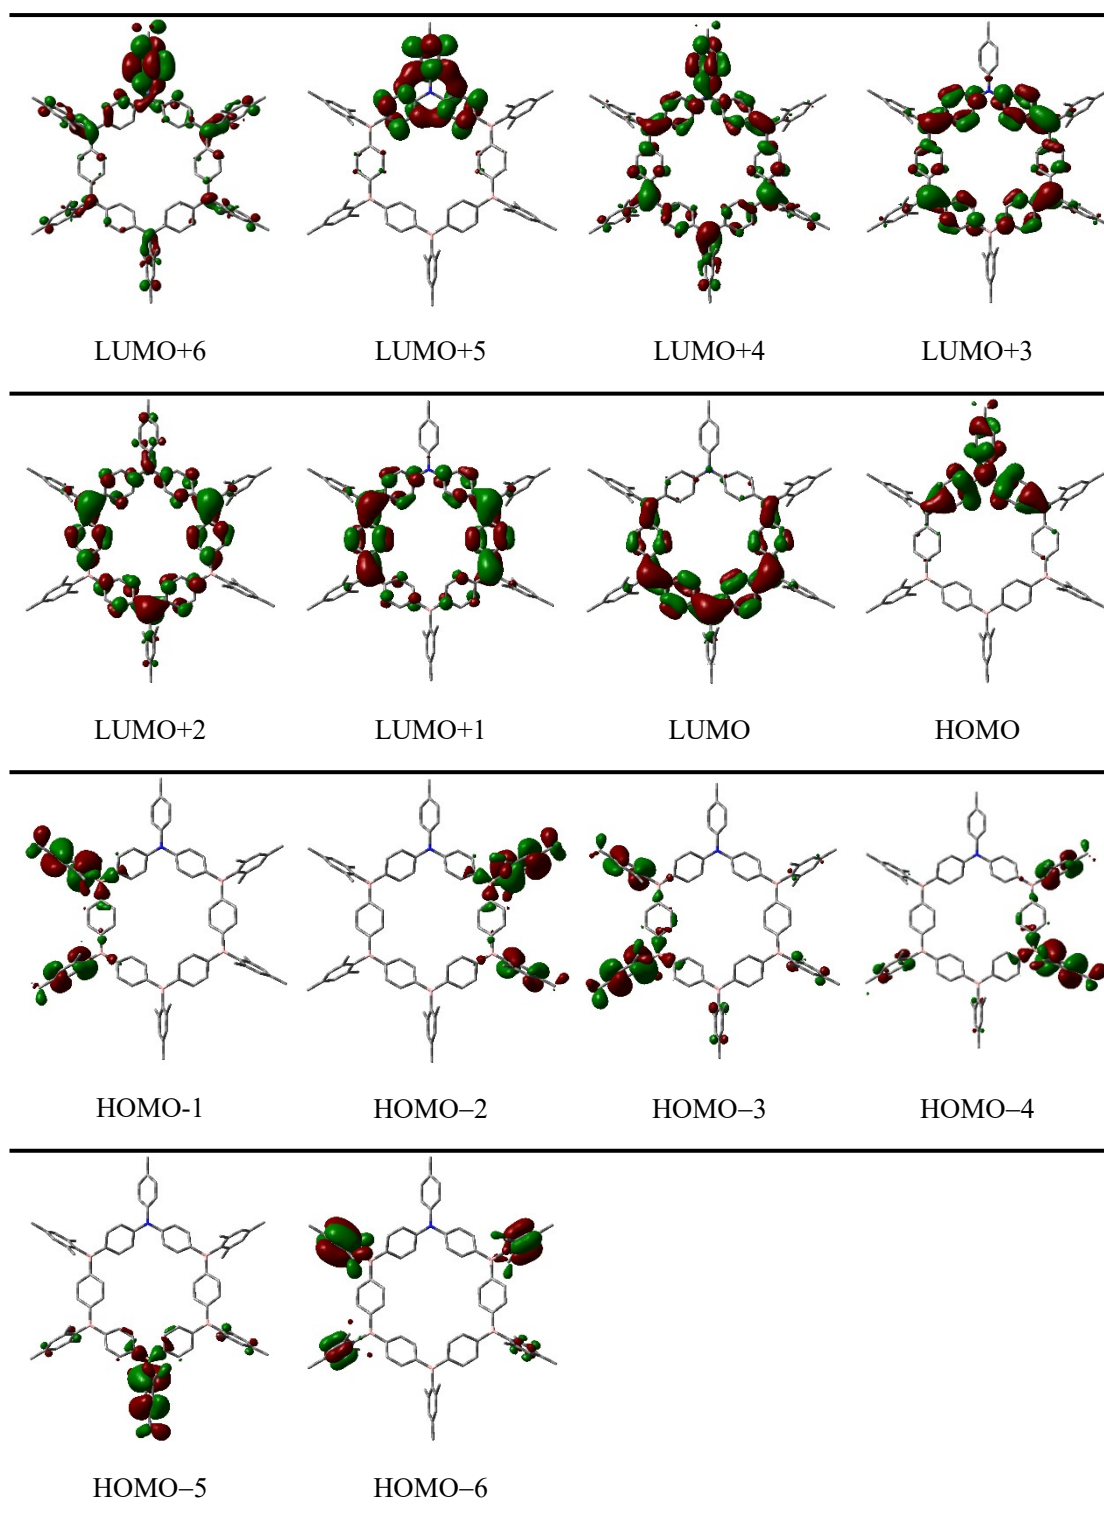

**Figure S30.** Molecular orbitals contributing to the TD-DFT calculated transitions of simplified MC-NB5 (iso = 0.02, B3LYP/6-31G\*). The substituents on aryl groups are simplified as Me groups.

**Table S10.** Summary of the TD-DFT calculations (B3LYP, 6-311G\*) for the simplified **MC-NB5**.

| Compound      | Transition                     | $\lambda$ , nm (eV) | Oscillator Strength, $f$ | Orbital Contributions                  |
|---------------|--------------------------------|---------------------|--------------------------|----------------------------------------|
| <b>MC-NB5</b> | S <sub>0</sub> →S <sub>1</sub> | 471 (2.63)          | 0.1094                   | HOMO→LUMO (99%)                        |
|               | S <sub>0</sub> →S <sub>2</sub> | 460 (2.70)          | 0.3297                   | HOMO→LUMO+1 (96%)                      |
|               | S <sub>0</sub> →S <sub>3</sub> | 407 (3.05)          | 0.0030                   | HOMO-3→LUMO (54%)<br>HOMO-1→LUMO (17%) |
|               | S <sub>0</sub> →S <sub>4</sub> | 406 (3.05)          | 0.0163                   | HOMO-4→LUMO (57%)<br>HOMO-2→LUMO (13%) |
|               | S <sub>0</sub> →S <sub>5</sub> | 403 (3.08)          | 0.0446                   | HOMO-5→LUMO (88%)                      |

**Table S11.** Summary of the TD-DFT calculations (CAM-B3LYP, 6-311G\*) for the simplified **MC-NB5**.

| Compound      | Transition                     | $\lambda$ , nm (eV) | Oscillator Strength, $f$ | Orbital Contributions                                         |
|---------------|--------------------------------|---------------------|--------------------------|---------------------------------------------------------------|
| <b>MC-NB5</b> | S <sub>0</sub> →S <sub>1</sub> | 358 (3.46)          | 0.5051                   | HOMO→LUMO+1 (66%)<br>HOMO→LUMO+3 (17%)                        |
|               | S <sub>0</sub> →S <sub>2</sub> | 320(3.87)           | 0.7833                   | HOMO→LUMO (37%)                                               |
|               | S <sub>0</sub> →S <sub>3</sub> | 319 (3.89)          | 0.0611                   | HOMO-4→LUMO (15%)<br>HOMO-3→LUMO (24%)<br>HOMO-3→LUMO+1 (18%) |
|               | S <sub>0</sub> →S <sub>4</sub> | 319 (3.89)          | 0.0693                   | HOMO-4→LUMO (25%)                                             |
|               | S <sub>0</sub> →S <sub>5</sub> | 317 (3.92)          | 0.0088                   | HOMO-5→LUMO (48%)<br>HOMO-5→LUMO+2 (10%)                      |

**Table S12.** Coordinates (Å) for the optimized structure (B3LYP, 6-31G\*) of simplified **MC-BN5**.

| Atom | X        | Y         | Z         | Atom | X        | Y         | Z         |
|------|----------|-----------|-----------|------|----------|-----------|-----------|
| C    | 4.836226 | 3.535218  | -0.807055 | C    | 3.778471 | -6.169715 | -0.059843 |
| C    | 3.688790 | 3.723770  | -0.020510 | C    | 4.912610 | -6.267171 | -0.881409 |
| C    | 3.233963 | 2.648164  | 0.758811  | C    | 3.393883 | -7.297241 | 0.682993  |
| C    | 3.907237 | 1.430616  | 0.759694  | C    | 5.638464 | -7.454038 | -0.944175 |
| C    | 5.061058 | 1.244961  | -0.019311 | H    | 5.219963 | -5.410379 | -1.472568 |
| C    | 5.509279 | 2.318570  | -0.807197 | C    | 4.119285 | -8.482479 | 0.594542  |
| H    | 5.196066 | 4.348851  | -1.429116 | H    | 2.521011 | -7.241024 | 1.325773  |
| H    | 2.354918 | 2.775866  | 1.382899  | C    | 5.260316 | -8.586942 | -0.211894 |
| H    | 3.548019 | 0.619159  | 1.384705  | H    | 6.511762 | -7.503419 | -1.591350 |
| H    | 6.389089 | 2.191979  | -1.429926 | H    | 3.796316 | -9.342083 | 1.178168  |
| C    | 5.067284 | -1.223582 | 0.011321  | C    | 1.591683 | 5.006725  | -0.046304 |
| C    | 5.521800 | -2.292197 | 0.802250  | C    | 0.866608 | 5.867188  | 0.794050  |

|   |           |           |           |   |            |           |           |
|---|-----------|-----------|-----------|---|------------|-----------|-----------|
| C | 3.913601  | -1.417507 | -0.765730 | C | 0.877811   | 4.173016  | -0.922885 |
| C | 4.854636  | -3.512083 | 0.807252  | C | -0.524176  | 5.881836  | 0.769061  |
| H | 6.401832  | -2.159122 | 1.423354  | H | 1.399651   | 6.514281  | 1.483359  |
| C | 3.246206  | -2.638271 | -0.759875 | C | -0.512254  | 4.192161  | -0.950349 |
| H | 3.549814  | -0.609879 | -1.393088 | H | 1.421736   | 3.515507  | -1.593780 |
| C | 3.707068  | -3.708928 | 0.022807  | C | -1.236017  | 5.039190  | -0.097085 |
| H | 5.219108  | -4.321713 | 1.431804  | H | -1.068205  | 6.539076  | 1.440348  |
| H | 2.367119  | -2.772355 | -1.382538 | H | -1.046647  | 3.547193  | -1.640847 |
| C | 7.189662  | 0.016387  | -0.010682 | C | 3.749169   | 6.184500  | 0.076102  |
| C | 7.907105  | 0.886209  | 0.824751  | C | 3.366188   | 7.311516  | -0.668603 |
| C | 7.907382  | -0.852409 | -0.846202 | C | 4.881660   | 6.282345  | 0.899583  |
| C | 9.299492  | 0.889345  | 0.810708  | C | 4.089757   | 8.497532  | -0.577524 |
| H | 7.367009  | 1.556574  | 1.486161  | H | 2.501258   | 7.250997  | -1.321673 |
| C | 9.300242  | -0.850802 | -0.835954 | C | 5.605692   | 7.470322  | 0.965280  |
| H | 7.368022  | -1.531933 | -1.498798 | H | 5.194653   | 5.422488  | 1.483279  |
| C | 10.026855 | 0.022870  | -0.016431 | C | 5.224452   | 8.605021  | 0.237527  |
| H | 9.832038  | 1.571032  | 1.470707  | H | 3.772831   | 9.354645  | -1.168139 |
| H | 9.833023  | -1.536892 | -1.491053 | H | 6.481735   | 7.517676  | 1.608831  |
| C | -3.379707 | 3.832943  | -0.059935 | C | -3.337313  | 6.300916  | -0.129487 |
| C | -4.666685 | 3.720876  | -0.624198 | C | -4.397856  | 6.566717  | 0.748741  |
| C | -2.823526 | 2.694337  | 0.555412  | C | -2.931509  | 7.307123  | -1.017806 |
| C | -5.355737 | 2.515876  | -0.569817 | C | -5.040248  | 7.802473  | 0.721993  |
| H | -5.118265 | 4.583051  | -1.103524 | H | -4.714447  | 5.802414  | 1.451587  |
| C | -3.509522 | 1.488307  | 0.555350  | C | -3.571085  | 8.544145  | -1.020768 |
| H | -1.850700 | 2.763847  | 1.029881  | H | -2.108746  | 7.115531  | -1.699701 |
| C | -4.797663 | 1.344612  | -0.009032 | C | -4.642310  | 8.816336  | -0.159410 |
| H | -6.352906 | 2.468191  | -1.000870 | H | -5.859347  | 7.986856  | 1.413718  |
| H | -3.046007 | 0.633261  | 1.039400  | H | -3.236371  | 9.310498  | -1.716608 |
| C | 1.615366  | -5.000234 | 0.050358  | B | -5.568681  | -0.012541 | -0.000892 |
| C | 0.896198  | -4.169180 | 0.925031  | N | 5.766221   | 0.012536  | -0.006424 |
| C | 0.895856  | -5.863563 | -0.791714 | N | 3.010352   | 4.973779  | -0.009693 |
| C | -0.493842 | -4.193908 | 0.949335  | N | -2.662134  | 5.045398  | -0.108286 |
| H | 1.435998  | -3.509442 | 1.597087  | N | 3.034210   | -4.961821 | 0.017600  |
| C | -0.494927 | -5.883930 | -0.769901 | N | -2.638176  | -5.056768 | 0.103105  |
| H | 1.433232  | -6.508634 | -1.479582 | C | -7.157479  | 0.653500  | 2.459170  |
| C | -1.212168 | -5.044159 | 0.094649  | H | -6.528007  | -0.175089 | 2.809391  |
| H | -1.032432 | -3.551080 | 1.638556  | C | -7.160924  | -0.696358 | -2.455267 |
| H | -1.034736 | -6.543516 | -1.442284 | H | -6.534540  | 0.133501  | -2.807996 |
| C | -4.791024 | -1.365935 | 0.006513  | C | -11.511005 | -0.008659 | -0.000106 |
| C | -3.502075 | -1.503066 | -0.557675 | H | -11.920913 | -0.786366 | -0.654505 |
| C | -5.343594 | -2.540256 | 0.566390  | C | -5.358406  | 10.146034 | -0.197555 |
| C | -2.810259 | -2.705786 | -0.558364 | H | -6.164779  | 10.145770 | -0.943602 |
| H | -3.042551 | -0.645510 | -1.041082 | H | -5.813041  | 10.384196 | 0.770047  |



|   |           |           |           |   |            |            |           |
|---|-----------|-----------|-----------|---|------------|------------|-----------|
| C | -4.648881 | -3.742036 | 0.619829  | H | -4.676465  | 10.962284  | -0.459923 |
| H | -6.341021 | -2.497669 | 0.997369  | C | 5.991526   | 9.902095   | 0.345884  |
| C | -3.361275 | -3.847509 | 0.055804  | H | 5.939301   | 10.477620  | -0.584903 |
| H | -1.836948 | -2.770342 | -1.032564 | H | 5.590733   | 10.541807  | 1.144213  |
| H | -5.096493 | -4.606760 | 1.098287  | H | 7.048409   | 9.725547   | 0.573390  |
| C | -7.153699 | -0.016331 | 0.000700  | C | 11.537127  | 0.049086   | -0.041919 |
| C | -7.878368 | 0.306496  | 1.171858  | H | 11.914235  | 0.779793   | -0.770570 |
| C | -7.880598 | -0.348214 | -1.167642 | H | 11.950247  | 0.325218   | 0.934505  |
| C | -9.277570 | 0.285864  | 1.159643  | H | 11.950994  | -0.926498  | -0.318779 |
| C | -9.278997 | -0.343352 | -1.149184 | C | 6.066800   | -9.863182  | -0.268231 |
| C | -9.999820 | -0.029596 | 0.006467  | H | 6.578925   | -9.971721  | -1.230555 |
| H | -9.816713 | 0.524415  | 2.075354  | H | 6.838446   | -9.886862  | 0.513560  |
| H | -9.819586 | -0.595529 | -2.060561 | H | 5.433526   | -10.745215 | -0.122816 |
| C | -3.307952 | -6.315242 | 0.122017  | C | -5.313534  | -10.168539 | 0.183553  |
| C | -4.365860 | -6.584623 | -0.758272 | H | -6.120926  | -10.172246 | 0.928485  |
| C | -2.899603 | -7.320479 | 1.010263  | H | -5.765862  | -10.407602 | -0.784905 |
| C | -5.003294 | -7.822986 | -0.733618 | H | -4.628654  | -10.982273 | 0.446088  |
| H | -4.684321 | -5.821018 | -1.461031 | H | -11.918498 | -0.163344  | 1.004825  |
| C | -3.534163 | -8.560086 | 1.011125  | H | -11.897233 | 0.953823   | -0.362883 |
| H | -2.078874 | -7.126085 | 1.693817  | H | -7.871286  | -0.934443  | -3.253888 |
| C | -4.602776 | -8.835920 | 0.147684  | H | -6.497698  | -1.559339  | -2.324918 |
| H | -5.820452 | -8.010130 | -1.426891 | H | -7.867170  | 0.888044   | 3.259430  |
| H | -3.197588 | -9.325626 | 1.706962  | H | -6.497137  | 1.518762   | 2.329338  |

**Table S13.** Coordinates (Å) for the optimized structure (B3LYP, 6-31G\*) of the model **MC-BN5** (without substituents).

| Atom | X        | Y        | Z        | Atom | X        | Y        | Z        |
|------|----------|----------|----------|------|----------|----------|----------|
| C    | 0.779799 | 3.522143 | 4.659712 | C    | 0.666467 | -1.00706 | -9.51962 |
| C    | -0.02103 | 3.703368 | 3.520971 | H    | 1.170232 | -1.80332 | -7.59208 |
| C    | -0.80518 | 2.625456 | 3.08069  | C    | 0        | 0        | -10.2212 |
| C    | -0.79578 | 1.41122  | 3.759741 | H    | -1.19148 | 1.790986 | -10.0601 |
| C    | -0.00171 | 1.232724 | 4.904032 | H    | 1.191483 | -1.79099 | -10.0601 |
| C    | 0.78986  | 2.30877  | 5.338518 | H    | 0        | 0        | -11.3086 |
| H    | 1.405766 | 4.337991 | 5.007425 | C    | -0.11895 | -6.28101 | -3.50486 |
| H    | -1.43947 | 2.748503 | 2.20835  | C    | 0.719166 | -6.5392  | -4.60109 |
| H    | -1.42313 | 0.596479 | 3.412173 | C    | -0.9899  | -7.28766 | -3.06003 |
| H    | 1.423829 | 2.186486 | 6.210924 | C    | 0.674261 | -7.77539 | -5.24306 |
| C    | 0.00171  | -1.23272 | 4.904032 | H    | 1.401092 | -5.76742 | -4.94381 |
| C    | -0.78986 | -2.30877 | 5.338518 | C    | -1.01572 | -8.52676 | -3.69741 |
| C    | 0.795777 | -1.41122 | 3.759741 | H    | -1.6418  | -7.0913  | -2.21459 |
| C    | -0.7798  | -3.52214 | 4.659712 | C    | -0.18879 | -8.77759 | -4.79431 |
| H    | -1.42383 | -2.18649 | 6.210924 | H    | 1.329663 | -7.95936 | -6.09035 |

|   |          |          |          |   |          |          |          |
|---|----------|----------|----------|---|----------|----------|----------|
| C | 0.805175 | -2.62546 | 3.08069  | H | -1.69654 | -9.2953  | -3.3408  |
| H | 1.423127 | -0.59648 | 3.412173 | H | -0.21591 | -9.74228 | -5.29295 |
| C | 0.02103  | -3.70337 | 3.520971 | C | 0.109138 | -6.16395 | 3.566155 |
| H | -1.40577 | -4.33799 | 5.007425 | C | 0.919948 | -6.26519 | 4.709084 |
| H | 1.439467 | -2.7485  | 2.20835  | C | -0.6332  | -7.28575 | 3.160304 |
| C | 0        | 0        | 7.032282 | C | 0.977325 | -7.45752 | 5.427867 |
| C | -0.8232  | 0.886298 | 7.745957 | H | 1.502305 | -5.40658 | 5.027531 |
| C | 0.823196 | -0.8863  | 7.745957 | C | -0.5549  | -8.4787  | 3.875898 |
| C | -0.81325 | 0.888565 | 9.139411 | H | -1.26931 | -7.21482 | 2.283818 |
| H | -1.46743 | 1.569532 | 7.201612 | C | 0.245871 | -8.57355 | 5.016065 |
| C | 0.813253 | -0.88857 | 9.139411 | H | 1.611065 | -7.51631 | 6.309079 |
| H | 1.467431 | -1.56953 | 7.201612 | H | -1.13716 | -9.3352  | 3.545812 |
| C | 0        | 0        | 9.846172 | H | 0.298881 | -9.50313 | 5.575466 |
| H | -1.45768 | 1.5812   | 9.674665 | C | -0.00543 | 4.971818 | 1.414499 |
| H | 1.457683 | -1.5812  | 9.674665 | C | -0.84064 | 5.835856 | 0.687774 |
| H | 0        | 0        | 10.9324  | C | 0.861862 | 4.127107 | 0.702696 |
| C | 0.04793  | 3.815501 | -3.56843 | C | -0.812   | 5.850961 | -0.70264 |
| C | 0.694786 | 3.704596 | -4.81425 | H | -1.526   | 6.488403 | 1.219239 |
| C | -0.62354 | 2.685677 | -3.06428 | C | 0.891533 | 4.144889 | -0.68761 |
| C | 0.653549 | 2.511139 | -5.52454 | H | 1.526147 | 3.463778 | 1.247603 |
| H | 1.231488 | 4.55771  | -5.21616 | C | 0.051643 | 5.003851 | -1.41274 |
| C | -0.61595 | 1.490183 | -3.77071 | H | -1.4758  | 6.514633 | -1.24801 |
| H | -1.14802 | 2.753851 | -2.11694 | H | 1.577653 | 3.493913 | -1.22036 |
| C | 0.013611 | 1.352213 | -5.02891 | C | -0.10914 | 6.163945 | 3.566155 |
| H | 1.163552 | 2.464275 | -6.48313 | C | 0.633198 | 7.285753 | 3.160304 |
| H | -1.14138 | 0.638254 | -3.34774 | C | -0.91995 | 6.265186 | 4.709084 |
| C | 0.005434 | -4.97182 | 1.414499 | C | 0.554902 | 8.478702 | 3.875898 |
| C | -0.86186 | -4.12711 | 0.702696 | H | 1.269311 | 7.214819 | 2.283818 |
| C | 0.840638 | -5.83586 | 0.687774 | C | -0.97733 | 7.457521 | 5.427867 |
| C | -0.89153 | -4.14489 | -0.68761 | H | -1.50231 | 5.406577 | 5.027531 |
| H | -1.52615 | -3.46378 | 1.247603 | C | -0.24587 | 8.573549 | 5.016065 |
| C | 0.812003 | -5.85096 | -0.70264 | H | 1.137157 | 9.335204 | 3.545812 |
| H | 1.526001 | -6.4884  | 1.219239 | H | -1.61107 | 7.516312 | 6.309079 |
| C | -0.05164 | -5.00385 | -1.41274 | H | -0.29888 | 9.503129 | 5.575466 |
| H | -1.57765 | -3.49391 | -1.22036 | C | 0.118954 | 6.281013 | -3.50486 |
| H | 1.475795 | -6.51463 | -1.24801 | C | -0.71917 | 6.539199 | -4.60109 |
| C | -0.01361 | -1.35221 | -5.02891 | C | 0.989897 | 7.287657 | -3.06003 |
| C | 0.615945 | -1.49018 | -3.77071 | C | -0.67426 | 7.775391 | -5.24306 |
| C | -0.65355 | -2.51114 | -5.52454 | H | -1.40109 | 5.767415 | -4.94381 |
| C | 0.623544 | -2.68568 | -3.06428 | C | 1.015721 | 8.52676  | -3.69741 |
| H | 1.14138  | -0.63825 | -3.34774 | H | 1.641799 | 7.091301 | -2.21459 |
| C | -0.69479 | -3.7046  | -4.81425 | C | 0.188789 | 8.77759  | -4.79431 |
| H | -1.16355 | -2.46428 | -6.48313 | H | -1.32966 | 7.959355 | -6.09035 |

|   |          |          |          |   |          |          |          |
|---|----------|----------|----------|---|----------|----------|----------|
| C | -0.04793 | -3.8155  | -3.56843 | H | 1.696538 | 9.295303 | -3.3408  |
| H | 1.148021 | -2.75385 | -2.11694 | H | 0.215914 | 9.742283 | -5.29295 |
| H | -1.23149 | -4.55771 | -5.21616 | B | 0        | 0        | -5.813   |
| C | 0        | 0        | -7.38549 | N | 0        | 0        | 5.610133 |
| C | -0.6532  | 1.009808 | -8.12514 | N | -0.03857 | 4.94872  | 2.834065 |
| C | 0.653196 | -1.00981 | -8.12514 | N | 0.07724  | 5.023184 | -2.83767 |
| C | -0.66647 | 1.007058 | -9.51962 | N | 0.038569 | -4.94872 | 2.834065 |
| H | -1.17023 | 1.803324 | -7.59208 | N | -0.07724 | -5.02318 | -2.83767 |

**Table S14.** Coordinates (Å) for the optimized structure (B3LYP, 6-31G\*) of simplified **MC-NB5**.

| Atom | X        | Y        | Z        | Atom | X        | Y        | Z        |
|------|----------|----------|----------|------|----------|----------|----------|
| C    | 3.691055 | -4.97712 | -0.28277 | H    | 7.052422 | 1.409183 | 0.890901 |
| C    | 3.760131 | -3.67537 | 0.260644 | H    | 3.18397  | 1.296869 | -0.98478 |
| C    | 2.563261 | -3.14235 | 0.786443 | C    | 6.483717 | -3.64676 | 0.338721 |
| C    | 1.362899 | -3.84239 | 0.721696 | C    | 7.316837 | -3.77983 | -0.79738 |
| C    | 1.282526 | -5.12226 | 0.130528 | C    | 6.905729 | -4.22881 | 1.557519 |
| C    | 2.48937  | -5.67894 | -0.34627 | C    | 8.524092 | -4.47935 | -0.6997  |
| H    | 4.599273 | -5.43721 | -0.66484 | C    | 8.128398 | -4.90441 | 1.62289  |
| H    | 2.577602 | -2.16177 | 1.25426  | C    | 8.954535 | -5.04292 | 0.504353 |
| H    | 0.466435 | -3.39179 | 1.138655 | H    | 9.145626 | -4.58465 | -1.58762 |
| H    | 2.475377 | -6.67726 | -0.77714 | H    | 8.441169 | -5.33813 | 2.571484 |
| C    | -1.41871 | -5.08705 | -0.14748 | C    | 6.477461 | 3.898359 | -0.30086 |
| C    | -2.63846 | -5.60887 | 0.335861 | C    | 7.069283 | 4.608019 | 0.770134 |
| C    | -1.46682 | -3.80821 | -0.7444  | C    | 7.147042 | 3.87851  | -1.54802 |
| C    | -3.82103 | -4.87524 | 0.273451 | C    | 8.291782 | 5.263381 | 0.583781 |
| H    | -2.6499  | -6.60513 | 0.771522 | C    | 8.358229 | 4.558942 | -1.70292 |
| C    | -2.64807 | -3.07613 | -0.80754 | C    | 8.9509   | 5.258493 | -0.64748 |
| H    | -0.56013 | -3.38361 | -1.16652 | H    | 8.73912  | 5.793515 | 1.423176 |
| C    | -3.85691 | -3.57428 | -0.27491 | H    | 8.854785 | 4.537991 | -2.67196 |
| H    | -4.73972 | -5.30925 | 0.660917 | C    | 0.17851  | 11.86138 | -0.00465 |
| H    | -2.63758 | -2.09733 | -1.27921 | H    | -0.78608 | 12.28706 | -0.30199 |
| C    | -0.09987 | -7.47289 | -8.6E-05 | C    | 10.25058 | 6.004402 | -0.84255 |
| C    | 0.180808 | -8.19508 | 1.184832 | H    | 10.08122 | 6.99165  | -1.29361 |
| C    | -0.40687 | -8.19984 | -1.17597 | H    | 10.76707 | 6.166328 | 0.109529 |
| C    | 0.14063  | -9.59311 | 1.177243 | H    | 10.93022 | 5.459763 | -1.50772 |
| C    | -0.41677 | -9.59781 | -1.15064 | C    | 10.28246 | -5.75756 | 0.599996 |
| C    | -0.14767 | -10.3165 | 0.017296 | H    | 10.55334 | -6.23005 | -0.35048 |
| H    | 0.342096 | -10.131  | 2.102263 | H    | 11.09259 | -5.06196 | 0.858345 |
| H    | -0.64553 | -10.1399 | -2.06692 | H    | 10.26509 | -6.53454 | 1.372019 |
| C    | 3.768972 | 3.935447 | -0.02873 | C    | -0.14423 | -11.8274 | 0.018461 |
| C    | 3.640063 | 5.207431 | -0.63161 | H    | 0.841831 | -12.2245 | -0.25885 |
| C    | 2.61811  | 3.443311 | 0.629522 | H    | -0.38796 | -12.2285 | 1.008131 |

|   |          |          |          |   |          |          |          |
|---|----------|----------|----------|---|----------|----------|----------|
| C | 2.440751 | 5.908738 | -0.643   | H | -0.86764 | -12.231  | -0.69856 |
| H | 4.502183 | 5.640665 | -1.13231 | C | -10.4023 | -5.5406  | -0.57617 |
| C | 1.425322 | 4.15131  | 0.671801 | H | -10.8636 | -5.43664 | -1.56442 |
| H | 2.670273 | 2.490389 | 1.148488 | H | -10.2712 | -6.61568 | -0.39214 |
| C | 1.305195 | 5.385252 | 0.004076 | H | -11.1128 | -5.1689  | 0.17015  |
| H | 2.372345 | 6.862673 | -1.15522 | C | -10.0886 | 6.268886 | 0.862216 |
| H | 0.575767 | 3.751447 | 1.214919 | H | -9.89223 | 7.251635 | 1.31216  |
| C | -5.13309 | -1.16849 | -0.14968 | H | -10.6051 | 6.443632 | -0.0876  |
| C | -4.04019 | -0.48743 | 0.429518 | H | -10.7788 | 5.74176  | 1.5306   |
| C | -6.20319 | -0.37028 | -0.6135  | H | 0.436588 | 12.26445 | 0.98013  |
| C | -4.00101 | 0.901652 | 0.503527 | H | 0.928761 | 12.23263 | -0.71572 |
| H | -3.21282 | -1.05955 | 0.839415 | B | -5.02123 | 3.270984 | 0.1044   |
| C | -6.16827 | 1.019093 | -0.52989 | B | -5.18468 | -2.73352 | -0.26061 |
| H | -7.07653 | -0.85795 | -1.03979 | B | -0.07852 | -5.89442 | -0.00694 |
| C | -5.05667 | 1.699988 | 0.013164 | B | 5.110433 | -2.87109 | 0.250359 |
| H | -3.14243 | 1.381444 | 0.965487 | B | 5.105337 | 3.135972 | -0.10814 |
| H | -7.01769 | 1.596582 | -0.88713 | C | -6.29422 | 4.821281 | -2.12984 |
| C | -1.16335 | 5.419263 | -0.01049 | H | -5.26701 | 5.200363 | -2.07861 |
| C | -1.31861 | 4.192862 | -0.68481 | H | -6.24106 | 3.818567 | -2.57439 |
| C | -2.28247 | 5.969725 | 0.642669 | H | -6.85331 | 5.457034 | -2.82401 |
| C | -2.52985 | 3.516946 | -0.64259 | C | -6.46679 | 3.301273 | 2.732732 |
| H | -0.4816  | 3.773442 | -1.23268 | H | -6.38213 | 2.229428 | 2.517724 |
| C | -3.50026 | 5.300893 | 0.631336 | H | -5.46054 | 3.653559 | 2.99491  |
| H | -2.18696 | 6.918617 | 1.159934 | H | -7.09628 | 3.415785 | 3.621049 |
| C | -3.66493 | 4.036036 | 0.02231  | C | -6.98196 | -3.00963 | 2.131441 |
| H | -2.60917 | 2.568526 | -1.16635 | H | -6.03233 | -3.43953 | 2.476206 |
| H | -4.34888 | 5.754176 | 1.137347 | H | -6.83759 | -1.9243  | 2.074357 |
| C | 0.100334 | 7.524255 | 0.001182 | H | -7.73074 | -3.20727 | 2.905198 |
| C | 0.833492 | 8.221906 | 0.968675 | C | -6.17929 | -3.93356 | -2.81694 |
| C | -0.61705 | 8.247136 | -0.96071 | H | -5.97029 | -2.8891  | -3.08298 |
| C | 0.853282 | 9.615217 | 0.962738 | H | -5.20977 | -4.43057 | -2.69207 |
| C | -0.60261 | 9.639628 | -0.94488 | H | -6.6835  | -4.39487 | -3.67219 |
| C | 0.136927 | 10.35142 | 0.010038 | C | -0.70578 | -7.4857  | -2.47901 |
| H | 1.426787 | 10.14006 | 1.723298 | H | -1.57978 | -6.83047 | -2.38887 |
| H | -1.16921 | 10.18353 | -1.69734 | H | 0.133531 | -6.85546 | -2.80102 |
| C | -6.37258 | 4.067747 | 0.30444  | H | -0.90493 | -8.20082 | -3.28357 |
| C | -6.94846 | 4.796006 | -0.76279 | C | 0.497507 | -7.4759  | 2.481021 |
| C | -7.03925 | 4.061319 | 1.553262 | H | 1.399617 | -6.85999 | 2.389991 |
| C | -8.15323 | 5.481903 | -0.57143 | H | -0.31659 | -6.80583 | 2.786702 |
| C | -8.23202 | 4.772447 | 1.713355 | H | 0.659111 | -8.18752 | 3.297009 |
| C | -8.80911 | 5.490277 | 0.661587 | C | 6.055266 | -4.11519 | 2.806683 |
| H | -8.58894 | 6.025829 | -1.40812 | H | 5.871902 | -3.06805 | 3.081008 |
| H | -8.72654 | 4.761294 | 2.683583 | H | 5.074018 | -4.58511 | 2.669865 |

|   |          |          |          |   |          |          |          |
|---|----------|----------|----------|---|----------|----------|----------|
| C | -6.5779  | -3.47347 | -0.34274 | H | 6.540768 | -4.59737 | 3.661235 |
| C | -7.02268 | -4.03725 | -1.56208 | C | 6.907721 | -3.1948  | -2.13447 |
| C | -7.40917 | -3.58673 | 0.796645 | H | 5.948947 | -3.60165 | -2.48192 |
| C | -8.26357 | -4.67883 | -1.62396 | H | 6.789884 | -2.10616 | -2.07937 |
| C | -8.63565 | -4.25269 | 0.702349 | H | 7.653979 | -3.41163 | -2.9055  |
| C | -9.08428 | -4.80562 | -0.49983 | C | 6.55805  | 3.137344 | -2.73139 |
| H | -8.59631 | -5.09249 | -2.57472 | H | 6.444763 | 2.067398 | -2.5201  |
| H | -9.25906 | -4.33737 | 1.591118 | H | 5.562108 | 3.51675  | -2.99503 |
| C | 5.101354 | -1.30523 | 0.138448 | H | 7.192682 | 3.238083 | -3.61772 |
| C | 6.189014 | -0.53558 | 0.609544 | C | 6.413405 | 4.644731 | 2.136116 |
| C | 4.030142 | -0.59542 | -0.44672 | H | 5.393076 | 5.041694 | 2.083588 |
| C | 6.190587 | 0.854333 | 0.527611 | H | 6.342209 | 3.642955 | 2.580343 |
| H | 7.046607 | -1.04626 | 1.0408   | H | 6.982563 | 5.270381 | 2.83129  |
| C | 4.027224 | 0.794301 | -0.5188  | N | 0.080462 | 6.092952 | -0.00274 |
| H | 3.190784 | -1.14564 | -0.86214 | H | -1.18843 | 7.71314  | -1.7139  |
| C | 5.100147 | 1.564416 | -0.02077 | H | 1.384324 | 7.668909 | 1.723428 |

**Table S15.** Coordinates (Å) for the optimized structure (B3LYP, 6-31G\*) of the model system **MC-NB5** (without substituents).

| Atom | X        | Y        | Z        | Atom | X        | Y        | Z        |
|------|----------|----------|----------|------|----------|----------|----------|
| C    | 3.730143 | 0.508151 | -5.03361 | C    | -0.79744 | 0.905126 | 9.38525  |
| C    | 3.836123 | -0.14967 | -3.78891 | H    | -1.40368 | 1.625249 | 7.443163 |
| C    | 2.664502 | -0.76477 | -3.29645 | C    | 0        | 0        | 10.089   |
| C    | 1.464469 | -0.72145 | -4.00105 | H    | 1.416842 | -1.6186  | 9.922118 |
| C    | 1.356928 | -0.05943 | -5.24385 | H    | -1.41684 | 1.618603 | 9.922118 |
| C    | 2.529368 | 0.553135 | -5.73753 | H    | 0        | 0        | 11.17528 |
| H    | 4.605726 | 1.000329 | -5.44914 | C    | -6.45436 | -0.25844 | 3.808337 |
| H    | 2.700214 | -1.28764 | -2.34415 | C    | -6.62434 | 0.288578 | 5.09932  |
| H    | 0.588565 | -1.2121  | -3.58447 | C    | -7.5625  | -0.93242 | 3.249268 |
| H    | 2.492443 | 1.080975 | -6.68693 | C    | -7.83075 | 0.178023 | 5.789653 |
| C    | -1.35693 | 0.059425 | -5.24385 | H    | -5.79806 | 0.823036 | 5.560281 |
| C    | -2.52937 | -0.55314 | -5.73753 | C    | -8.76332 | -1.07107 | 3.943693 |
| C    | -1.46447 | 0.721452 | -4.00105 | H    | -7.4724  | -1.36443 | 2.256254 |
| C    | -3.73014 | -0.50815 | -5.03361 | C    | -8.90198 | -0.50986 | 5.215236 |
| H    | -2.49244 | -1.08098 | -6.68693 | H    | -7.93586 | 0.623639 | 6.775751 |
| C    | -2.6645  | 0.764766 | -3.29645 | H    | -9.59311 | -1.60983 | 3.493    |
| H    | -0.58857 | 1.212096 | -3.58447 | H    | -9.84087 | -0.60629 | 5.754958 |
| C    | -3.83612 | 0.149667 | -3.78891 | C    | -6.55053 | 0.25371  | -3.75811 |
| H    | -4.60573 | -1.00033 | -5.44914 | C    | -6.66119 | 0.938691 | -4.98851 |
| H    | -2.70021 | 1.287636 | -2.34415 | C    | -7.72208 | -0.3569  | -3.25842 |
| C    | 0        | 0        | -7.60021 | C    | -7.87294 | 1.026348 | -5.67218 |
| C    | 0.993207 | -0.68043 | -8.3389  | H    | -5.78141 | 1.420396 | -5.4066  |

|   |          |          |          |   |          |          |          |
|---|----------|----------|----------|---|----------|----------|----------|
| C | -0.99321 | 0.680434 | -8.3389  | C | -8.93104 | -0.29822 | -3.95024 |
| C | 0.988482 | -0.69488 | -9.73289 | H | -7.67661 | -0.89826 | -2.31746 |
| H | 1.773306 | -1.2177  | -7.80651 | C | -9.01065 | 0.401364 | -5.15648 |
| C | -0.98848 | 0.69488  | -9.73289 | H | -7.9305  | 1.575071 | -6.60889 |
| H | -1.77331 | 1.217703 | -7.80651 | H | -9.81208 | -0.7921  | -3.54812 |
| C | 0        | 0        | -10.4336 | H | -9.95471 | 0.458278 | -5.69274 |
| H | 1.756924 | -1.2415  | -10.2738 | C | 5.164392 | -0.11259 | -1.41904 |
| H | -1.75692 | 1.2415   | -10.2738 | C | 6.151253 | -0.74377 | -0.62974 |
| H | 0        | 0        | -11.5208 | C | 4.153135 | 0.587033 | -0.72481 |
| C | 3.73923  | 0.085924 | 3.785447 | C | 6.132755 | -0.67212 | 0.76081  |
| C | 3.54537  | 0.753085 | 5.016483 | H | 6.943371 | -1.30414 | -1.11952 |
| C | 2.61948  | -0.61303 | 3.278585 | C | 4.13119  | 0.652852 | 0.665829 |
| C | 2.326488 | 0.74821  | 5.683114 | H | 3.375435 | 1.09341  | -1.29035 |
| H | 4.366753 | 1.319882 | 5.445894 | C | 5.121522 | 0.027877 | 1.453704 |
| C | 1.405722 | -0.66571 | 3.951714 | H | 6.914562 | -1.17211 | 1.327134 |
| H | 2.714282 | -1.15594 | 2.342221 | H | 3.335859 | 1.207953 | 1.156813 |
| C | 1.234672 | 0.029827 | 5.162761 | C | 6.550526 | -0.25371 | -3.75811 |
| H | 2.209672 | 1.302194 | 6.608822 | C | 7.722084 | 0.356902 | -3.25842 |
| H | 0.582596 | -1.24408 | 3.545269 | C | 6.661188 | -0.93869 | -4.98851 |
| C | -5.16439 | 0.112589 | -1.41904 | C | 8.931043 | 0.298223 | -3.95024 |
| C | -4.15314 | -0.58703 | -0.72481 | H | 7.676612 | 0.898257 | -2.31746 |
| C | -6.15125 | 0.743772 | -0.62974 | C | 7.872942 | -1.02635 | -5.67218 |
| C | -4.13119 | -0.65285 | 0.665829 | H | 5.781411 | -1.4204  | -5.4066  |
| H | -3.37544 | -1.09341 | -1.29035 | C | 9.010647 | -0.40136 | -5.15648 |
| C | -6.13276 | 0.672115 | 0.76081  | H | 9.812083 | 0.792098 | -3.54812 |
| H | -6.94337 | 1.304139 | -1.11952 | H | 7.930495 | -1.57507 | -6.60889 |
| C | -5.12152 | -0.02788 | 1.453704 | H | 9.954714 | -0.45828 | -5.69274 |
| H | -3.33586 | -1.20795 | 1.156813 | C | 6.454363 | 0.258442 | 3.808337 |
| H | -6.91456 | 1.172108 | 1.327134 | C | 6.624338 | -0.28858 | 5.09932  |
| C | -1.23467 | -0.02983 | 5.162761 | C | 7.562495 | 0.932424 | 3.249268 |
| C | -1.40572 | 0.665709 | 3.951714 | C | 7.830749 | -0.17802 | 5.789653 |
| C | -2.32649 | -0.74821 | 5.683114 | H | 5.798059 | -0.82304 | 5.560281 |
| C | -2.61948 | 0.613032 | 3.278585 | C | 8.763324 | 1.071067 | 3.943693 |
| H | -0.5826  | 1.244082 | 3.545269 | H | 7.472402 | 1.364427 | 2.256254 |
| C | -3.54537 | -0.75309 | 5.016483 | C | 8.901976 | 0.509855 | 5.215236 |
| H | -2.20967 | -1.30219 | 6.608822 | H | 7.935859 | -0.62364 | 6.775751 |
| C | -3.73923 | -0.08592 | 3.785447 | H | 9.593114 | 1.609829 | 3.493    |
| H | -2.71428 | 1.155939 | 2.342221 | H | 9.840867 | 0.606294 | 5.754958 |
| H | -4.36675 | -1.31988 | 5.445894 | B | -5.10187 | -0.1214  | 3.024092 |
| C | 0        | 0        | 7.283886 | B | -5.18753 | 0.176212 | -2.98716 |
| C | 0.793834 | -0.91381 | 7.991268 | B | 0        | 0        | -6.03248 |
| C | -0.79383 | 0.913813 | 7.991268 | B | 5.187527 | -0.17621 | -2.98716 |
| C | 0.797444 | -0.90513 | 9.38525  | B | 5.101869 | 0.121399 | 3.024092 |

|   |          |          |          |   |   |   |          |
|---|----------|----------|----------|---|---|---|----------|
| H | 1.403682 | -1.62525 | 7.443163 | N | 0 | 0 | 5.854418 |
|---|----------|----------|----------|---|---|---|----------|

## References

- [1] (a) A. Pelter, K. Smith, D. Buss, Z. Jin, *Heteroatom Chemistry*, 1992, **3**, 275–277; (b) K. Ruhlandt-Senge, J. J. Ellison, R. J. Wehmschulte, F. Pauer, P. P. Power, *J. Am. Chem. Soc.*, 1993, **115**, 11353–11357.
- [2] (a) S. I. Hauck, K. V. Lakshmi, J. F. Hartwig, *Org. Lett.*, 1999, **1**, 2057–2060; (b) R. A. Singer, J. P. Sadighi, S. L. Buchwald, *J. Am. Chem. Soc.*, 1998, **120**, 213–214; (c) P. Li, D. Shimoyama, N. Zhang, Y. Jia, G. Hu, C. Li, X. Yin, N. Wang, F. Jäkle and P. Chen, *Angew. Chem., Int. Ed.*, **2022**, 61, e2022006.
- [3] (a) A. Ito, Y. Yokoyama, R. Aihara, K. Fukui, S. Eguchi, K. Shizu, T. Sato, K. Tanaka, *Angew. Chem., Int. Ed.*, 2010, **49**, 8205–8208. (b) P. Chen, R. A. Lalancette, F. Jäkle, *Angew. Chem., Int. Ed.*, 2012, **51**, 7994–7998. (c) N. Baser-Kirazli, R. A. Lalancette, F. Jäkle, *Angew. Chem., Int. Ed.*, 2020, **59**, 8689–8697. (d) P. Chen, F. Jäkle, *J. Am. Chem. Soc.*, 2011, **133**, 20142–20145. (e) P. Chen, X. Yin, N. Baser-Kirazli, F. Jäkle, *Angew. Chem., Int. Ed.*, 2015, **54**, 10768–10772. (f) N. Baser-Kirazli, R. A. Lalancette, F. Jäkle, *Organometallics* 2021, **40**, 520–528.
- [4] M. J. Frisch, G. W. Trucks, H. B. Schlegel, G. E. Scuseria, M. A. Robb, J. R. Cheeseman, G. Scalmani, V. Barone, B. Mennucci, G. A. H. Petersson, M. Nakatsuji, X. Caricato, H. P. F. Li, A. Hratchian, J. Izmaylov, G. Bloino, J. L. Zheng, M. Sonnenberg, M. Hada, K. Ehara, R. Toyota, J. Fukuda, M. Hasegawa, T. Ishida, Y. Nakajima, O. Honda, H. Kitao, T. Nakai, J. A. Vreven, J. E. Montgomery Jr., F. Peralta, M. Ogliaro, J. J. Bearpark, E. Heyd, K. N. Brothers, V. N. Kudin, T. Staroverov, R. Keith, J. Kobayashi, K. Normand, A. Raghavachari, J. C. Rendell, S. S. Burant, J. Iyengar, M. Tomasi, N. Cossi, J. M. Rega, M. Millam, J. E. Klene, J. B. Knox, V. Cross, C. Bakken, J. Adamo, R. Jaramillo, R. E. Gomperts, O. Stratmann, A. J. Yazyev, R. Austin, C. Cammi, J. W. Pomelli, R. L. Ochterski, K. Martin, V. G. Morokuma, G. A. Zakrzewski, P. Voth, J. J. Salvador, S. Dannenberg, A. D. Dapprich, O. Daniels, J. B. Farkas, J. V. Foresman, J. Ortiz, J. Cioslowski, D. J. Fox, Gaussian 09 Revision C. 01, 2010.
- [5] (a) C. Lee, W. Yang, R. G. Parr, *Phys. Rev. B*, 1988, **37**, 785–789; (b) A. D. Becke, *J. Chem. Phys.*, 1993, **98**, 1372–1377.
- [6] (a) R. Ditchfield, W. J. Hehre, J. A. Pople, *J. Chem. Phys.*, 1971, **54**, 724–728; (b) A. D. McLean, G. S. Chandler, *J. Chem. Phys.*, 1980, **72**, 5639–5648.
